# Supplementary material for: Christmas, national holidays, sport events, and time factors as triggers of acute myocardial infarction: SWEDEHEART observational study 1998-2013
Source: PubMed Central journal article supplement (PMC6289164; doi:10.1136/bmj.k4811), 2018-12-12
Supplement: mohm046569.ww1.pdf [file mohm046569.ww1.pdf]

## Supplementary Materials

**Supplementary Table 1.**

|                              | <b>All MIs</b>   |         | <b>NSTEMI</b>    |         | <b>STEMI</b>     |         |
|------------------------------|------------------|---------|------------------|---------|------------------|---------|
|                              | IRR (95%CI)      | Q-value | IRR (95%CI)      | Q-value | IRR (95%CI)      | Q-value |
| Sunday                       |                  |         |                  |         |                  |         |
| Monday                       | 1.09 (1.08-1.11) | <0.001  | 1.12 (1.1-1.13)  | <0.001  | 1.05 (1.03-1.08) | 0.024   |
| Tuesday                      | 1.02 (1.01-1.03) | 1       | 1.03 (1.02-1.05) | 0.07    | 0.99 (0.97-1.02) | 0.993   |
| Wednesday                    | 1.02 (1.01-1.04) | 0.327   | 1.04 (1.02-1.06) | 0.002   | 0.99 (0.97-1.01) | 0.993   |
| Thursday                     | 1.03 (1.02-1.04) | 0.019   | 1.05 (1.03-1.07) | <0.001  | 0.99 (0.97-1.02) | 0.993   |
| Friday                       | 1.02 (1.01-1.03) | 1       | 1.03 (1.02-1.05) | 0.002   | 0.99 (0.97-1.02) | 0.993   |
| Saturday                     | 0.98 (0.96-0.99) | 0.389   | 0.97 (0.96-0.99) | 0.736   | 0.98 (0.96-1.01) | 0.993   |
| <b>Hour of symptom onset</b> |                  |         |                  |         |                  |         |
| 01:00                        | 0.89 (0.86-0.91) | <0.001  | 0.88 (0.85-0.91) | <0.001  | 0.98 (0.93-1.04) | 0.993   |
| 02:00                        | 0.92 (0.89-0.94) | <0.001  | 0.9 (0.87-0.93)  | <0.001  | 1.01 (0.96-1.07) | 0.993   |
| 03:00                        | 0.91 (0.88-0.94) | <0.001  | 0.89 (0.86-0.92) | <0.001  | 1.02 (0.96-1.07) | 0.993   |
| 04:00                        | 0.86 (0.84-0.89) | <0.001  | 0.85 (0.83-0.88) | <0.001  | 0.99 (0.94-1.05) | 0.993   |
| 05:00                        | 0.83 (0.8-0.85)  | <0.001  | 0.81 (0.78-0.84) | <0.001  | 0.99 (0.94-1.04) | 0.993   |
| 06:00                        | 0.95 (0.92-0.97) | 0.042   | 0.9 (0.87-0.93)  | <0.001  | 1.04 (0.99-1.09) | 0.993   |
| 07:00                        | 1.09 (1.07-1.12) | <0.001  | 1.01 (0.98-1.05) | 0.998   | 1.11 (1.05-1.16) | 0.023   |
| 08:00                        | 1.58 (1.55-1.62) | <0.001  | 1.42 (1.38-1.46) | <0.001  | 1.28 (1.22-1.34) | <0.001  |
| 09:00                        | 1.17 (1.14-1.2)  | <0.001  | 1.04 (1.01-1.07) | 0.998   | 1.18 (1.13-1.24) | <0.001  |
| 10:00                        | 1.24 (1.21-1.27) | <0.001  | 1.08 (1.04-1.11) | 0.001   | 1.23 (1.17-1.28) | <0.001  |
| 11:00                        | 1 (0.97-1.02)    | 1       | 0.89 (0.86-0.92) | <0.001  | 1.15 (1.1-1.2)   | <0.001  |
| 12:00                        | 1.23 (1.2-1.26)  | <0.001  | 1.11 (1.08-1.15) | <0.001  | 1.18 (1.13-1.24) | <0.001  |
| 13:00                        | 0.91 (0.89-0.94) | <0.001  | 0.85 (0.82-0.88) | <0.001  | 1.06 (1.01-1.12) | 0.993   |
| 14:00                        | 0.96 (0.93-0.99) | 1       | 0.89 (0.86-0.92) | <0.001  | 1.08 (1.03-1.13) | 0.993   |
| 15:00                        | 1 (0.97-1.03)    | 1       | 0.94 (0.91-0.97) | 0.042   | 1.08 (1.03-1.14) | 0.745   |
| 16:00                        | 0.9 (0.88-0.93)  | <0.001  | 0.87 (0.84-0.9)  | <0.001  | 1.05 (1-1.1)     | 0.993   |
| 17:00                        | 0.85 (0.82-0.87) | <0.001  | 0.83 (0.8-0.86)  | <0.001  | 1 (0.95-1.05)    | 0.993   |
| 18:00                        | 0.89 (0.86-0.91) | <0.001  | 0.87 (0.84-0.9)  | <0.001  | 1.02 (0.97-1.07) | 0.993   |
| 19:00                        | 0.86 (0.83-0.88) | <0.001  | 0.84 (0.81-0.87) | <0.001  | 1 (0.95-1.05)    | 0.993   |
| 20:00                        | 0.98 (0.95-1)    | 1       | 0.96 (0.93-0.99) | 0.998   | 1.01 (0.96-1.07) | 0.993   |
| 21:00                        | 0.89 (0.86-0.91) | <0.001  | 0.88 (0.85-0.91) | <0.001  | 0.99 (0.94-1.04) | 0.993   |
| 22:00                        | 0.95 (0.92-0.97) | 0.036   | 0.93 (0.9-0.96)  | 0.004   | 1.01 (0.96-1.06) | 0.993   |
| 23:00                        | 0.93 (0.91-0.96) | 0.001   | 0.92 (0.89-0.95) | <0.001  | 1.01 (0.96-1.07) | 0.993   |

**Supplementary Table 1. Results of circadian and circaseptan variation.**

All P-values are adjusted for multiple testing. Hours are defined as the hour of symptom onset. i.e. 00:00 - 00:59. Sunday and midnight were set as reference periods.

**Supplementary  
Table 2.**

|                     | Total MI         |         | Non ST-Elevation MI |         | ST-Elevation MI  |         |
|---------------------|------------------|---------|---------------------|---------|------------------|---------|
| Christmas/New Years | IRR (95%CI)      | Q-value | IRR (95%CI)         | Q-value | IRR (95%CI)      | Q-value |
| Men                 | 1.15 (1.11-1.19) | <0.001  | 1.22 (1.16-1.27)    | <0.001  | 1.02 (0.96-1.09) | 0.993   |
| Women               | 1.16 (1.11-1.22) | <0.001  | 1.21 (1.14-1.29)    | <0.001  | 1.06 (0.97-1.16) | 0.993   |
| Age≥75yo            | 1.22 (1.17-1.27) | <0.001  | 1.28 (1.21-1.34)    | <0.001  | 1.06 (0.98-1.16) | 0.993   |
| Age<75yo            | 1.1 (1.05-1.14)  | 0.009   | 1.15 (1.09-1.21)    | <0.001  | 1.01 (0.95-1.09) | 0.993   |
| Current Smoker      | 1.09 (1.02-1.17) | 1.000   | 1.13 (1.03-1.24)    | 0.998   | 1.05 (0.94-1.16) | 0.993   |
| Non Smoker          | 1.16 (1.12-1.2)  | <0.001  | 1.18 (1.13-1.22)    | <0.001  | 1.12 (1.08-1.17) | <0.001  |
| Diabetes            | 1.28 (1.2-1.36)  | <0.001  | 1.33 (1.24-1.42)    | <0.001  | 1.12 (0.99-1.27) | 0.993   |
| No Diabetes         | 1.11 (1.08-1.15) | <0.001  | 1.18 (1.13-1.23)    | <0.001  | 1.01 (0.95-1.07) | 0.993   |
| Hypertension        | 1.16 (1.11-1.22) | <0.001  | 1.21 (1.15-1.28)    | <0.001  | 1.05 (0.96-1.14) | 0.993   |
| No Hypertension     | 1.13 (1.09-1.18) | <0.001  | 1.21 (1.15-1.27)    | <0.001  | 1.01 (0.95-1.09) | 0.993   |
| CAD                 | 1.26 (1.2-1.32)  | <0.001  | 1.26 (1.2-1.32)     | <0.001  | 1.26 (1.2-1.32)  | <0.001  |
| No CAD              | 1.09 (1.05-1.14) | 0.002   | 1.15 (1.1-1.21)     | <0.001  | 1 (0.94-1.07)    | 0.993   |
| Beta-blockers       | 1.21 (1.16-1.27) | <0.001  | 1.27 (1.21-1.33)    | <0.001  | 1.06 (0.96-1.16) | 0.993   |
| No Beta-blockers    | 1.1 (1.06-1.15)  | 0.001   | 1.16 (1.1-1.22)     | <0.001  | 1.02 (0.96-1.09) | 0.993   |
| Ca-inhibitors       | 1.24 (1.16-1.33) | <0.001  | 1.3 (1.2-1.41)      | <0.001  | 1.07 (0.93-1.23) | 0.993   |
| No Ca-inhibitors    | 1.13 (1.1-1.17)  | <0.001  | 1.19 (1.14-1.24)    | <0.001  | 1.03 (0.97-1.09) | 0.993   |
| Aspirin             | 1.22 (1.16-1.27) | <0.001  | 1.26 (1.2-1.33)     | <0.001  | 1.07 (0.98-1.18) | 0.993   |
| No Aspirin          | 1.1 (1.06-1.15)  | 0.002   | 1.17 (1.11-1.23)    | <0.001  | 1.01 (0.95-1.08) | 0.993   |
| ACE-I/ARB           | 1.15 (1.09-1.21) | <0.001  | 1.16 (1.1-1.22)     | <0.001  | 1.19 (1.12-1.26) | <0.001  |
| No ACE-I/ARB        | 1.16 (1.12-1.2)  | <0.001  | 1.22 (1.15-1.29)    | <0.001  | 0.91 (0.84-0.99) | 0.993   |
| Statins             | 1.19 (1.12-1.25) | <0.001  | 1.26 (1.18-1.34)    | <0.001  | 0.95 (0.84-1.08) | 0.993   |
| No Statins          | 1.14 (1.1-1.18)  | <0.001  | 1.19 (1.14-1.25)    | <0.001  | 1.05 (0.99-1.12) | 0.993   |
| Easter              |                  |         |                     |         |                  |         |
| Men                 | 1.04 (1-1.09)    | 1.000   | 1.04 (0.98-1.1)     | 0.998   | 1.05 (0.97-1.13) | 0.993   |
| Women               | 1.05 (0.99-1.11) | 1.000   | 1.05 (0.98-1.13)    | 0.998   | 1.05 (0.94-1.17) | 0.993   |
| Age≥75yo            | 1.07 (1.02-1.13) | 1.000   | 1.08 (1.02-1.15)    | 0.998   | 1.05 (0.95-1.17) | 0.993   |
| Age<75yo            | 1.02 (0.97-1.07) | 1.000   | 1 (0.94-1.07)       | 0.998   | 1.05 (0.97-1.13) | 0.993   |
| Current Smoker      | 0.99 (0.91-1.07) | 1.000   | 0.97 (0.87-1.09)    | 0.998   | 1.01 (0.89-1.14) | 0.993   |
| Non Smoker          | 1.07 (1.03-1.12) | 0.422   | 1.07 (1.02-1.12)    | 0.998   | 1.07 (1.01-1.12) | 0.993   |
| Diabetes            | 1.11 (1.03-1.2)  | 1.000   | 1.15 (1.06-1.26)    | 0.490   | 0.99 (0.84-1.16) | 0.993   |
| No Diabetes         | 1.03 (0.99-1.07) | 1.000   | 1.01 (0.96-1.06)    | 0.998   | 1.06 (0.99-1.14) | 0.993   |
| Hypertension        | 1.08 (1.02-1.14) | 1.000   | 1.08 (1.01-1.15)    | 0.998   | 1.09 (0.98-1.2)  | 0.993   |
| No Hypertension     | 1.02 (0.97-1.07) | 1.000   | 1.02 (0.96-1.09)    | 0.998   | 1.03 (0.95-1.11) | 0.993   |
| CAD                 | 1.11 (1.04-1.18) | 0.327   | 1.11 (1.04-1.18)    | 0.296   | 1.11 (1.04-1.18) | 0.889   |
| No CAD              | 1.01 (0.97-1.06) | 1.000   | 0.99 (0.93-1.05)    | 0.998   | 1.03 (0.96-1.11) | 0.993   |
| Beta-blockers       | 1.08 (1.02-1.14) | 1.000   | 1.09 (1.02-1.16)    | 0.998   | 1.06 (0.95-1.19) | 0.993   |
| No Beta-blockers    | 1.02 (0.97-1.07) | 1.000   | 1 (0.94-1.07)       | 0.998   | 1.04 (0.97-1.13) | 0.993   |
| Ca-inhibitors       | 1.13 (1.04-1.23) | 1.000   | 1.11 (1.01-1.23)    | 0.998   | 1.19 (1.01-1.4)  | 0.993   |
| No Ca-inhibitors    | 1.03 (0.99-1.07) | 1.000   | 1.03 (0.98-1.08)    | 0.998   | 1.03 (0.96-1.1)  | 0.993   |

|                  |                  |        |                  |        |                  |       |
|------------------|------------------|--------|------------------|--------|------------------|-------|
| Aspirin          | 1.07 (1.01-1.13) | 1.000  | 1.06 (1-1.13)    | 0.998  | 1.07 (0.96-1.2)  | 0.993 |
| No Aspirin       | 1.03 (0.98-1.08) | 1.000  | 1.02 (0.96-1.09) | 0.998  | 1.04 (0.96-1.12) | 0.993 |
| ACE-I/ARB        | 1.1 (1.03-1.17)  | 1.000  | 1.1 (1.03-1.17)  | 0.998  | 1.11 (1.03-1.19) | 0.993 |
| No ACE-I/ARB     | 1.02 (0.98-1.07) | 1.000  | 1.04 (0.97-1.12) | 0.998  | 1.04 (0.95-1.15) | 0.993 |
| Statins          | 1.04 (0.97-1.12) | 1.000  | 1.07 (0.98-1.15) | 0.998  | 0.95 (0.81-1.11) | 0.993 |
| No Statins       | 1.05 (1-1.09)    | 1.000  | 1.03 (0.98-1.09) | 0.998  | 1.07 (1-1.15)    | 0.993 |
| Midsummer        |                  |        |                  |        |                  |       |
| Men              | 1.15 (1.08-1.23) | 0.003  | 1.21 (1.12-1.3)  | 0.001  | 1.06 (0.95-1.18) | 0.993 |
| Women            | 1.07 (0.98-1.16) | 1.000  | 1.09 (0.98-1.2)  | 0.998  | 1.03 (0.89-1.2)  | 0.993 |
| Age≥75yo         | 1.14 (1.06-1.22) | 0.246  | 1.18 (1.08-1.29) | 0.049  | 1.02 (0.88-1.18) | 0.993 |
| Age<75yo         | 1.11 (1.04-1.19) | 0.726  | 1.14 (1.05-1.25) | 0.814  | 1.07 (0.95-1.19) | 0.993 |
| Current Smoker   | 1.03 (0.91-1.15) | 1.000  | 1.11 (0.95-1.29) | 0.998  | 0.93 (0.77-1.11) | 0.993 |
| Non Smoker       | 1.14 (1.08-1.21) | 0.005  | 1.16 (1.09-1.24) | 0.001  | 1.11 (1.04-1.19) | 0.993 |
| Diabetes         | 1.19 (1.07-1.32) | 0.454  | 1.22 (1.09-1.38) | 0.330  | 1.08 (0.87-1.34) | 0.993 |
| No Diabetes      | 1.11 (1.05-1.17) | 0.196  | 1.14 (1.07-1.23) | 0.078  | 1.04 (0.95-1.15) | 0.993 |
| Hypertension     | 1.18 (1.1-1.28)  | 0.004  | 1.23 (1.12-1.34) | 0.003  | 1.09 (0.95-1.25) | 0.993 |
| No Hypertension  | 1.08 (1.01-1.16) | 1.000  | 1.11 (1.02-1.21) | 0.998  | 1.03 (0.92-1.15) | 0.993 |
| CAD              | 1.19 (1.1-1.29)  | 0.010  | 1.19 (1.09-1.29) | 0.018  | 1.19 (1.1-1.29)  | 0.028 |
| No CAD           | 1.09 (1.02-1.16) | 1.000  | 1.13 (1.04-1.23) | 0.998  | 1.02 (0.92-1.13) | 0.993 |
| Beta-blockers    | 1.21 (1.12-1.3)  | <0.001 | 1.27 (1.17-1.38) | <0.001 | 1.03 (0.88-1.21) | 0.993 |
| No Beta-blockers | 1.06 (0.99-1.14) | 1.000  | 1.06 (0.98-1.16) | 0.998  | 1.06 (0.95-1.18) | 0.993 |
| Ca-inhibitors    | 1.18 (1.05-1.32) | 1.000  | 1.29 (1.13-1.47) | 0.065  | 0.89 (0.7-1.15)  | 0.993 |
| No Ca-inhibitors | 1.11 (1.05-1.18) | 0.070  | 1.13 (1.06-1.21) | 0.144  | 1.08 (0.98-1.18) | 0.993 |
| Aspirin          | 1.23 (1.14-1.32) | <0.001 | 1.28 (1.18-1.39) | <0.001 | 1.07 (0.91-1.25) | 0.993 |
| No Aspirin       | 1.04 (0.97-1.12) | 1.000  | 1.04 (0.95-1.14) | 0.998  | 1.04 (0.94-1.16) | 0.993 |
| ACE-I/ARB        | 1.15 (1.06-1.26) | 0.515  | 1.17 (1.07-1.28) | 0.288  | 1.15 (1.04-1.27) | 0.993 |
| No ACE-I/ARB     | 1.11 (1.04-1.18) | 0.277  | 1.14 (1.04-1.26) | 0.998  | 1.06 (0.93-1.21) | 0.993 |
| Statins          | 1.23 (1.12-1.35) | 0.009  | 1.24 (1.12-1.38) | 0.022  | 1.17 (0.95-1.42) | 0.993 |
| No Statins       | 1.09 (1.02-1.15) | 1.000  | 1.13 (1.04-1.21) | 0.590  | 1.03 (0.93-1.13) | 0.993 |
| UEFA Euro Cup    |                  |        |                  |        |                  |       |
| Men              | 0.99 (0.95-1.04) | 1.000  | 0.97 (0.92-1.03) | 0.998  | 1.04 (0.96-1.12) | 0.993 |
| Women            | 1.03 (0.97-1.09) | 1.000  | 1.04 (0.97-1.12) | 0.998  | 1.01 (0.91-1.13) | 0.993 |
| Age≥75yo         | 1.01 (0.96-1.06) | 1.000  | 1.01 (0.95-1.08) | 0.998  | 1 (0.91-1.11)    | 0.993 |
| Age<75yo         | 1.01 (0.96-1.06) | 1.000  | 0.98 (0.92-1.05) | 0.998  | 1.05 (0.97-1.13) | 0.993 |
| Current Smoker   | 1.03 (0.95-1.11) | 1.000  | 1.03 (0.92-1.14) | 0.998  | 1.03 (0.91-1.16) | 0.993 |
| Non Smoker       | 0.99 (0.95-1.04) | 1.000  | 0.98 (0.94-1.03) | 0.998  | 1.01 (0.96-1.06) | 0.993 |
| Diabetes         | 1 (0.93-1.08)    | 1.000  | 0.95 (0.87-1.04) | 0.998  | 1.15 (1-1.34)    | 0.993 |
| No Diabetes      | 1.01 (0.97-1.05) | 1.000  | 1.01 (0.96-1.07) | 0.998  | 1.01 (0.94-1.08) | 0.993 |
| Hypertension     | 1.01 (0.95-1.06) | 1.000  | 0.98 (0.92-1.04) | 0.998  | 1.08 (0.98-1.19) | 0.993 |
| No Hypertension  | 1.01 (0.96-1.06) | 1.000  | 1.02 (0.96-1.08) | 0.998  | 1 (0.92-1.09)    | 0.993 |
| CAD              | 1.02 (0.96-1.08) | 1.000  | 1.02 (0.96-1.08) | 0.998  | 1.01 (0.95-1.07) | 0.993 |
| No CAD           | 1 (0.96-1.05)    | 1.000  | 0.99 (0.93-1.05) | 0.998  | 1.02 (0.95-1.09) | 0.993 |
| Beta-blockers    | 1.01 (0.96-1.07) | 1.000  | 0.98 (0.92-1.05) | 0.998  | 1.09 (0.98-1.22) | 0.993 |
| No Beta-blockers | 1 (0.96-1.05)    | 1.000  | 1.01 (0.95-1.07) | 0.998  | 1 (0.93-1.08)    | 0.993 |
| Ca-inhibitors    | 0.99 (0.91-1.08) | 1.000  | 0.99 (0.89-1.09) | 0.998  | 0.99 (0.84-1.16) | 0.993 |
| No Ca-inhibitors | 1.01 (0.97-1.05) | 1.000  | 1 (0.95-1.05)    | 0.998  | 1.04 (0.97-1.11) | 0.993 |
| Aspirin          | 1 (0.95-1.06)    | 1.000  | 1 (0.94-1.06)    | 0.998  | 1.01 (0.91-1.13) | 0.993 |

|              |                  |       |                  |        |                  |        |
|--------------|------------------|-------|------------------|--------|------------------|--------|
| No Aspirin   | 1.01 (0.97-1.06) | 1.000 | 1 (0.93-1.06)    | 0.998  | 1.04 (0.96-1.12) | 0.993  |
| ACE-I/ARB    | 0.99 (0.93-1.06) | 1.000 | 0.98 (0.92-1.05) | 0.998  | 0.99 (0.93-1.07) | 0.993  |
| No ACE-I/ARB | 1.02 (0.97-1.06) | 1.000 | 1.19 (1.11-1.27) | <0.001 | 1.26 (1.16-1.38) | <0.001 |
| Statins      | 1 (0.93-1.07)    | 1.000 | 0.98 (0.91-1.06) | 0.998  | 1.07 (0.93-1.24) | 0.993  |
| No Statins   | 1.01 (0.97-1.05) | 1.000 | 1 (0.95-1.06)    | 0.998  | 1.02 (0.95-1.09) | 0.993  |

#### FIFA world cup

|                  |                  |       |                  |       |                  |       |
|------------------|------------------|-------|------------------|-------|------------------|-------|
| Men              | 0.99 (0.95-1.03) | 1.000 | 0.98 (0.93-1.03) | 0.998 | 1.01 (0.94-1.08) | 0.993 |
| Women            | 0.96 (0.91-1.01) | 1.000 | 0.96 (0.9-1.02)  | 0.998 | 0.96 (0.87-1.06) | 0.993 |
| Age≥75yo         | 0.95 (0.91-1)    | 1.000 | 0.95 (0.9-1.01)  | 0.998 | 0.96 (0.88-1.05) | 0.993 |
| Age<75yo         | 1 (0.95-1.04)    | 1.000 | 0.99 (0.94-1.05) | 0.998 | 1.01 (0.94-1.08) | 0.993 |
| Current Smoker   | 0.93 (0.86-1)    | 1.000 | 0.94 (0.85-1.03) | 0.998 | 0.92 (0.83-1.03) | 0.993 |
| Non Smoker       | 1 (0.96-1.03)    | 1.000 | 1 (0.96-1.04)    | 0.998 | 1.03 (0.98-1.08) | 0.993 |
| Diabetes         | 0.96 (0.9-1.03)  | 1.000 | 0.95 (0.87-1.03) | 0.998 | 1.01 (0.88-1.16) | 0.993 |
| No Diabetes      | 0.98 (0.94-1.02) | 1.000 | 0.98 (0.93-1.02) | 0.998 | 0.99 (0.93-1.05) | 0.993 |
| Hypertension     | 0.94 (0.9-0.99)  | 1.000 | 0.93 (0.88-0.99) | 0.998 | 0.96 (0.88-1.06) | 0.993 |
| No Hypertension  | 1.01 (0.96-1.05) | 1.000 | 1 (0.95-1.06)    | 0.998 | 1.01 (0.94-1.09) | 0.993 |
| CAD              | 0.99 (0.94-1.05) | 1.000 | 1 (0.95-1.05)    | 0.998 | 0.99 (0.94-1.05) | 0.993 |
| No CAD           | 0.97 (0.93-1.01) | 1.000 | 0.96 (0.91-1.01) | 0.998 | 0.96 (0.9-1.03)  | 0.993 |
| Beta-blockers    | 0.95 (0.9-1)     | 1.000 | 0.94 (0.89-1)    | 0.998 | 0.97 (0.87-1.07) | 0.993 |
| No Beta-blockers | 1 (0.96-1.04)    | 1.000 | 1 (0.94-1.05)    | 0.998 | 1 (0.94-1.07)    | 0.993 |
| Ca-inhibitors    | 1.01 (0.93-1.09) | 1.000 | 1.01 (0.92-1.11) | 0.998 | 0.99 (0.86-1.15) | 0.993 |
| No Ca-inhibitors | 0.97 (0.94-1.01) | 1.000 | 0.96 (0.92-1.01) | 0.998 | 0.99 (0.93-1.05) | 0.993 |
| Aspirin          | 0.95 (0.9-1)     | 1.000 | 0.95 (0.9-1)     | 0.998 | 0.95 (0.86-1.05) | 0.993 |
| No Aspirin       | 1 (0.96-1.05)    | 1.000 | 1 (0.94-1.05)    | 0.998 | 1.01 (0.94-1.08) | 0.993 |
| ACE-I/ARB        | 0.91 (0.85-0.96) | 0.486 | 0.91 (0.86-0.97) | 0.910 | 0.92 (0.86-0.99) | 0.993 |
| No ACE-I/ARB     | 1.01 (0.97-1.05) | 1.000 | 0.88 (0.82-0.94) | 0.093 | 0.89 (0.81-0.97) | 0.993 |
| Statins          | 0.9 (0.85-0.97)  | 0.884 | 0.9 (0.84-0.97)  | 0.998 | 0.92 (0.81-1.06) | 0.993 |
| No Statins       | 1 (0.97-1.04)    | 1.000 | 1 (0.96-1.05)    | 0.998 | 1 (0.95-1.07)    | 0.993 |

#### Winter Olympic Games

|                  |                  |       |                  |       |                  |       |
|------------------|------------------|-------|------------------|-------|------------------|-------|
| Men              | 0.99 (0.94-1.04) | 1.000 | 1 (0.94-1.07)    | 0.998 | 0.96 (0.88-1.05) | 0.993 |
| Women            | 0.92 (0.86-0.99) | 1.000 | 0.91 (0.83-0.99) | 0.998 | 0.94 (0.83-1.07) | 0.993 |
| Age≥75yo         | 0.98 (0.92-1.04) | 1.000 | 0.96 (0.89-1.04) | 0.998 | 1.01 (0.9-1.14)  | 0.993 |
| Age<75yo         | 0.95 (0.9-1.01)  | 1.000 | 0.97 (0.9-1.05)  | 0.998 | 0.92 (0.84-1.01) | 0.993 |
| Current Smoker   | 0.95 (0.86-1.05) | 1.000 | 1.04 (0.91-1.18) | 0.998 | 0.85 (0.73-0.98) | 0.993 |
| Non Smoker       | 0.97 (0.92-1.02) | 1.000 | 0.97 (0.92-1.03) | 0.998 | 0.97 (0.91-1.03) | 0.993 |
| Diabetes         | 0.9 (0.82-0.98)  | 1.000 | 0.92 (0.83-1.03) | 0.998 | 0.82 (0.69-0.99) | 0.993 |
| No Diabetes      | 0.98 (0.93-1.03) | 1.000 | 0.98 (0.92-1.04) | 0.998 | 0.98 (0.91-1.06) | 0.993 |
| Hypertension     | 0.91 (0.86-0.98) | 1.000 | 0.89 (0.82-0.96) | 0.998 | 0.97 (0.86-1.09) | 0.993 |
| No Hypertension  | 1 (0.94-1.06)    | 1.000 | 1.03 (0.96-1.11) | 0.998 | 0.95 (0.86-1.04) | 0.993 |
| CAD              | 1.01 (0.94-1.09) | 1.000 | 1.02 (0.95-1.09) | 0.998 | 1.02 (0.95-1.1)  | 0.993 |
| No CAD           | 0.93 (0.89-0.99) | 1.000 | 0.94 (0.87-1.01) | 0.998 | 0.94 (0.86-1.02) | 0.993 |
| Beta-blockers    | 0.96 (0.9-1.03)  | 1.000 | 0.96 (0.89-1.04) | 0.998 | 0.96 (0.85-1.1)  | 0.993 |
| No Beta-blockers | 0.96 (0.91-1.02) | 1.000 | 0.97 (0.9-1.05)  | 0.998 | 0.95 (0.87-1.04) | 0.993 |
| Ca-inhibitors    | 0.88 (0.79-0.97) | 1.000 | 0.88 (0.78-1)    | 0.998 | 0.86 (0.7-1.05)  | 0.993 |
| No Ca-inhibitors | 0.98 (0.94-1.03) | 1.000 | 0.99 (0.93-1.05) | 0.998 | 0.97 (0.9-1.05)  | 0.993 |

|              |                  |       |                  |       |                  |       |
|--------------|------------------|-------|------------------|-------|------------------|-------|
| Aspirin      | 0.97 (0.91-1.03) | 1.000 | 0.98 (0.91-1.06) | 0.998 | 0.91 (0.8-1.04)  | 0.993 |
| No Aspirin   | 0.96 (0.91-1.02) | 1.000 | 0.95 (0.88-1.02) | 0.998 | 0.97 (0.89-1.06) | 0.993 |
| ACE-I/ARB    | 0.9 (0.83-0.98)  | 1.000 | 0.89 (0.82-0.97) | 0.998 | 0.93 (0.85-1.01) | 0.993 |
| No ACE-I/ARB | 0.99 (0.94-1.04) | 1.000 | 0.89 (0.81-0.97) | 0.998 | 0.91 (0.81-1.02) | 0.993 |
| Statins      | 0.89 (0.82-0.97) | 1.000 | 0.9 (0.82-1)     | 0.998 | 0.86 (0.73-1.03) | 0.993 |
| No Statins   | 0.99 (0.94-1.04) | 1.000 | 0.99 (0.93-1.06) | 0.998 | 0.98 (0.9-1.06)  | 0.993 |

#### Summer Olympic Games

|                  |                  |       |                  |        |                  |       |
|------------------|------------------|-------|------------------|--------|------------------|-------|
| Men              | 1.06 (1.01-1.12) | 1.000 | 1.09 (1.02-1.16) | 0.998  | 1.02 (0.93-1.12) | 0.993 |
| Women            | 1 (0.93-1.07)    | 1.000 | 0.97 (0.89-1.06) | 0.998  | 1.07 (0.94-1.21) | 0.993 |
| Age≥75yo         | 1.04 (0.98-1.11) | 1.000 | 1.03 (0.95-1.1)  | 0.998  | 1.09 (0.97-1.23) | 0.993 |
| Age<75yo         | 1.04 (0.98-1.1)  | 1.000 | 1.06 (0.98-1.14) | 0.998  | 1 (0.91-1.1)     | 0.993 |
| Current Smoker   | 1.08 (0.99-1.19) | 1.000 | 1.06 (0.93-1.2)  | 0.998  | 1.12 (0.97-1.3)  | 0.993 |
| Non Smoker       | 1.02 (0.97-1.07) | 1.000 | 1.02 (0.97-1.08) | 0.998  | 1.01 (0.95-1.08) | 0.993 |
| Diabetes         | 1.04 (0.95-1.14) | 1.000 | 1.01 (0.91-1.12) | 0.998  | 1.14 (0.95-1.36) | 0.993 |
| No Diabetes      | 1.04 (0.99-1.09) | 1.000 | 1.05 (0.99-1.12) | 0.998  | 1.02 (0.94-1.1)  | 0.993 |
| Hypertension     | 1.01 (0.94-1.07) | 1.000 | 1 (0.93-1.08)    | 0.998  | 1.02 (0.91-1.15) | 0.993 |
| No Hypertension  | 1.06 (1-1.12)    | 1.000 | 1.06 (0.99-1.14) | 0.998  | 1.06 (0.96-1.16) | 0.993 |
| CAD              | 1.04 (0.97-1.12) | 1.000 | 1.04 (0.97-1.12) | 0.998  | 1.03 (0.96-1.11) | 0.993 |
| No CAD           | 1.04 (0.99-1.1)  | 1.000 | 1.03 (0.96-1.1)  | 0.998  | 1.04 (0.96-1.13) | 0.993 |
| Beta-blockers    | 1.06 (0.99-1.13) | 1.000 | 1.06 (0.99-1.15) | 0.998  | 1.03 (0.9-1.17)  | 0.993 |
| No Beta-blockers | 1.03 (0.97-1.09) | 1.000 | 1.02 (0.95-1.09) | 0.998  | 1.04 (0.95-1.14) | 0.993 |
| Ca-inhibitors    | 1.1 (1-1.22)     | 1.000 | 1.13 (1-1.27)    | 0.998  | 1.05 (0.87-1.26) | 0.993 |
| No Ca-inhibitors | 1.03 (0.98-1.08) | 1.000 | 1.02 (0.96-1.08) | 0.998  | 1.04 (0.96-1.12) | 0.993 |
| Aspirin          | 1.04 (0.97-1.11) | 1.000 | 1.04 (0.96-1.12) | 0.998  | 1.03 (0.9-1.18)  | 0.993 |
| No Aspirin       | 1.04 (0.99-1.1)  | 1.000 | 1.04 (0.97-1.12) | 0.998  | 1.04 (0.95-1.14) | 0.993 |
| ACE-I/ARB        | 1.01 (0.93-1.09) | 1.000 | 0.98 (0.91-1.06) | 0.998  | 0.99 (0.91-1.07) | 0.993 |
| No ACE-I/ARB     | 1.05 (1-1.11)    | 1.000 | 1.33 (1.23-1.44) | <0.001 | 1.28 (1.15-1.43) | 0.003 |
| Statins          | 1.06 (0.98-1.16) | 1.000 | 1.06 (0.96-1.16) | 0.998  | 1.09 (0.92-1.29) | 0.993 |
| No Statins       | 1.03 (0.98-1.08) | 1.000 | 1.03 (0.97-1.1)  | 0.998  | 1.03 (0.94-1.11) | 0.993 |

#### Men

|           |                  |        |                  |        |                  |       |
|-----------|------------------|--------|------------------|--------|------------------|-------|
| Monday    | 1.1 (1.08-1.12)  | <0.001 | 1.13 (1.11-1.15) | <0.001 | 1.04 (1.01-1.07) | 0.993 |
| Tuesday   | 1.01 (1-1.03)    | 1.000  | 1.03 (1.01-1.05) | 0.998  | 0.98 (0.95-1.01) | 0.993 |
| Wednesday | 1.02 (1-1.03)    | 1.000  | 1.04 (1.02-1.06) | 0.078  | 0.97 (0.95-1)    | 0.993 |
| Thursday  | 1.02 (1-1.04)    | 1.000  | 1.05 (1.02-1.07) | 0.016  | 0.98 (0.95-1.01) | 0.993 |
| Friday    | 1.01 (0.99-1.02) | 1.000  | 1.03 (1-1.05)    | 0.078  | 0.97 (0.94-1)    | 0.993 |
| Saturday  | 0.98 (0.96-0.99) | 1.000  | 0.97 (0.95-0.99) | 0.998  | 0.98 (0.95-1.01) | 0.993 |

#### Women

|           |                  |        |                  |        |                  |       |
|-----------|------------------|--------|------------------|--------|------------------|-------|
| Monday    | 1.08 (1.06-1.11) | <0.001 | 1.09 (1.06-1.12) | <0.001 | 1.06 (1.02-1.11) | 0.993 |
| Tuesday   | 1.03 (1-1.05)    | 1.000  | 1.03 (1.01-1.06) | 0.998  | 1.01 (0.97-1.06) | 0.993 |
| Wednesday | 1.04 (1.01-1.06) | 0.910  | 1.04 (1.01-1.07) | 0.998  | 1.03 (0.98-1.07) | 0.993 |
| Thursday  | 1.04 (1.02-1.07) | 0.147  | 1.05 (1.02-1.08) | 0.181  | 1.03 (0.98-1.07) | 0.993 |
| Friday    | 1.04 (1.02-1.07) | 0.083  | 1.05 (1.02-1.08) | 0.998  | 1.04 (0.99-1.08) | 0.993 |
| Saturday  | 0.98 (0.96-1)    | 1.000  | 0.97 (0.95-1)    | 0.998  | 0.99 (0.95-1.03) | 0.993 |

#### Age≥75yo

|         |                  |        |                  |        |                  |       |
|---------|------------------|--------|------------------|--------|------------------|-------|
| Monday  | 1.1 (1.08-1.12)  | <0.001 | 1.1 (1.07-1.13)  | <0.001 | 1.1 (1.05-1.14)  | 0.003 |
| Tuesday | 1.04 (1.02-1.06) | 0.036  | 1.03 (1.01-1.06) | 0.998  | 1.06 (1.02-1.11) | 0.993 |

|                 |                  |        |                  |        |                  |       |
|-----------------|------------------|--------|------------------|--------|------------------|-------|
| Wednesday       | 1.07 (1.04-1.09) | <0.001 | 1.07 (1.04-1.09) | <0.001 | 1.06 (1.02-1.11) | 0.993 |
| Thursday        | 1.08 (1.05-1.1)  | <0.001 | 1.08 (1.06-1.11) | <0.001 | 1.06 (1.02-1.1)  | 0.993 |
| Friday          | 1.06 (1.04-1.08) | <0.001 | 1.07 (1.04-1.09) | <0.001 | 1.05 (1.01-1.1)  | 0.993 |
| Saturday        | 0.98 (0.96-1)    | 1.000  | 0.98 (0.96-1.01) | 0.998  | 0.99 (0.95-1.03) | 0.993 |
| Age<75yo        |                  |        |                  |        |                  |       |
| Monday          | 1.09 (1.07-1.11) | <0.001 | 1.13 (1.1-1.16)  | <0.001 | 1.03 (1-1.06)    | 0.993 |
| Tuesday         | 1 (0.98-1.02)    | 1.000  | 1.03 (1.01-1.06) | 0.998  | 0.95 (0.92-0.98) | 0.960 |
| Wednesday       | 0.99 (0.97-1.01) | 1.000  | 1.02 (0.99-1.04) | 0.998  | 0.95 (0.92-0.98) | 0.425 |
| Thursday        | 0.99 (0.97-1.01) | 1.000  | 1.01 (0.99-1.04) | 0.998  | 0.96 (0.93-0.98) | 0.993 |
| Friday          | 0.99 (0.97-1)    | 1.000  | 1 (0.98-1.03)    | 0.998  | 0.96 (0.93-0.99) | 0.993 |
| Saturday        | 0.97 (0.95-0.99) | 0.820  | 0.96 (0.94-0.99) | 0.998  | 0.98 (0.95-1.01) | 0.993 |
| Current Smoker  |                  |        |                  |        |                  |       |
| Monday          | 1.04 (1.01-1.08) | 1.000  | 1.07 (1.03-1.12) | 0.287  | 1.01 (0.96-1.06) | 0.993 |
| Tuesday         | 0.98 (0.95-1.02) | 1.000  | 1.01 (0.97-1.05) | 0.998  | 0.95 (0.91-1)    | 0.993 |
| Wednesday       | 1 (0.96-1.03)    | 1.000  | 1.04 (0.99-1.08) | 0.998  | 0.95 (0.9-0.99)  | 0.993 |
| Thursday        | 0.98 (0.95-1.01) | 1.000  | 1.01 (0.97-1.06) | 0.998  | 0.94 (0.89-0.98) | 0.993 |
| Friday          | 1 (0.97-1.04)    | 1.000  | 1.01 (0.97-1.06) | 0.998  | 0.99 (0.95-1.04) | 0.993 |
| Saturday        | 0.98 (0.95-1.02) | 1.000  | 0.98 (0.94-1.02) | 0.998  | 0.99 (0.95-1.04) | 0.993 |
| Non Smoker      |                  |        |                  |        |                  |       |
| Monday          | 1.11 (1.09-1.12) | <0.001 | 1.13 (1.11-1.15) | <0.001 | 1.06 (1.03-1.09) | 0.066 |
| Tuesday         | 1.02 (1.01-1.04) | 1.000  | 1.03 (1.01-1.05) | 0.415  | 1.01 (0.98-1.04) | 0.993 |
| Wednesday       | 1.03 (1.01-1.04) | 0.406  | 1.04 (1.02-1.06) | 0.066  | 1 (0.97-1.03)    | 0.993 |
| Thursday        | 1.04 (1.02-1.05) | 0.004  | 1.05 (1.03-1.07) | <0.001 | 1.01 (0.98-1.04) | 0.993 |
| Friday          | 1.02 (1-1.04)    | 1.000  | 1.04 (1.02-1.06) | 0.066  | 0.99 (0.96-1.02) | 0.993 |
| Saturday        | 0.98 (0.96-0.99) | 1.000  | 0.97 (0.95-0.99) | 0.998  | 0.99 (0.96-1.01) | 0.993 |
| Diabetes        |                  |        |                  |        |                  |       |
| Monday          | 1.09 (1.06-1.13) | <0.001 | 1.11 (1.07-1.15) | <0.001 | 1.05 (0.99-1.12) | 0.993 |
| Tuesday         | 1.06 (1.03-1.09) | 0.073  | 1.06 (1.02-1.1)  | 0.384  | 1.06 (1-1.12)    | 0.993 |
| Wednesday       | 1.03 (1-1.06)    | 1.000  | 1.03 (0.99-1.07) | 0.998  | 1.03 (0.97-1.1)  | 0.993 |
| Thursday        | 1.07 (1.04-1.1)  | 0.002  | 1.09 (1.05-1.13) | <0.001 | 1.02 (0.96-1.08) | 0.993 |
| Friday          | 1.07 (1.04-1.1)  | 0.003  | 1.08 (1.04-1.11) | 0.998  | 1.05 (0.99-1.11) | 0.993 |
| Saturday        | 1 (0.97-1.03)    | 1.000  | 1.01 (0.98-1.05) | 0.998  | 0.95 (0.89-1)    | 0.993 |
| No Diabetes     |                  |        |                  |        |                  |       |
| Monday          | 1.09 (1.08-1.11) | <0.001 | 1.12 (1.1-1.14)  | <0.001 | 1.05 (1.02-1.08) | 0.115 |
| Tuesday         | 1.01 (0.99-1.02) | 1.000  | 1.03 (1.01-1.05) | 0.998  | 0.98 (0.95-1.01) | 0.993 |
| Wednesday       | 1.02 (1.01-1.04) | 1.000  | 1.05 (1.03-1.07) | 0.003  | 0.98 (0.96-1.01) | 0.993 |
| Thursday        | 1.02 (1-1.03)    | 1.000  | 1.03 (1.01-1.05) | 0.332  | 0.99 (0.96-1.01) | 0.993 |
| Friday          | 1.01 (0.99-1.02) | 1.000  | 1.02 (1-1.04)    | 0.003  | 0.98 (0.96-1.01) | 0.993 |
| Saturday        | 0.97 (0.96-0.99) | 0.120  | 0.96 (0.94-0.98) | 0.028  | 0.99 (0.96-1.02) | 0.993 |
| Hypertension    |                  |        |                  |        |                  |       |
| Monday          | 1.09 (1.07-1.12) | <0.001 | 1.11 (1.08-1.14) | <0.001 | 1.06 (1.02-1.1)  | 0.993 |
| Tuesday         | 1.04 (1.02-1.06) | 0.045  | 1.04 (1.02-1.07) | 0.420  | 1.04 (1-1.08)    | 0.993 |
| Wednesday       | 1.04 (1.02-1.06) | 0.190  | 1.04 (1.02-1.07) | 0.221  | 1.02 (0.98-1.06) | 0.993 |
| Thursday        | 1.06 (1.04-1.09) | <0.001 | 1.07 (1.05-1.1)  | <0.001 | 1.04 (1-1.08)    | 0.993 |
| Friday          | 1.04 (1.02-1.06) | 0.102  | 1.05 (1.02-1.08) | 0.221  | 1.01 (0.98-1.05) | 0.993 |
| Saturday        | 0.99 (0.97-1.01) | 1.000  | 0.99 (0.97-1.02) | 0.998  | 0.99 (0.95-1.02) | 0.993 |
| No Hypertension |                  |        |                  |        |                  |       |
| Monday          | 1.09 (1.07-1.11) | <0.001 | 1.12 (1.1-1.15)  | <0.001 | 1.05 (1.01-1.08) | 0.993 |
| Tuesday         | 1 (0.98-1.02)    | 1.000  | 1.03 (1-1.05)    | 0.998  | 0.96 (0.93-0.99) | 0.993 |

|                  |                  |        |                  |        |                  |       |
|------------------|------------------|--------|------------------|--------|------------------|-------|
| Wednesday        | 1.01 (0.99-1.03) | 1.000  | 1.04 (1.01-1.06) | 0.527  | 0.97 (0.94-1)    | 0.993 |
| Thursday         | 1 (0.99-1.02)    | 1.000  | 1.03 (1-1.05)    | 0.998  | 0.97 (0.94-1)    | 0.993 |
| Friday           | 1.01 (0.99-1.02) | 1.000  | 1.02 (1-1.05)    | 0.527  | 0.98 (0.95-1.01) | 0.993 |
| Saturday         | 0.97 (0.95-0.99) | 0.329  | 0.96 (0.94-0.98) | 0.243  | 0.98 (0.95-1.01) | 0.993 |
| CAD              |                  |        |                  |        |                  |       |
| Monday           | 1.08 (1.05-1.1)  | <0.001 | 1.08 (1.05-1.1)  | <0.001 | 1.08 (1.03-1.14) | 0.993 |
| Tuesday          | 1.02 (0.99-1.04) | 1.000  | 1.02 (1-1.05)    | 0.998  | 1 (0.95-1.05)    | 0.993 |
| Wednesday        | 1.02 (1-1.05)    | 1.000  | 1.03 (1-1.05)    | 0.998  | 1.01 (0.96-1.06) | 0.993 |
| Thursday         | 1.04 (1.02-1.07) | 0.210  | 1.05 (1.02-1.08) | 0.155  | 1.02 (0.97-1.07) | 0.993 |
| Friday           | 1.04 (1.02-1.07) | 0.168  | 1.05 (1.02-1.07) | 0.998  | 1.03 (0.98-1.08) | 0.993 |
| Saturday         | 0.98 (0.96-1.01) | 1.000  | 0.98 (0.96-1.01) | 0.998  | 0.99 (0.94-1.04) | 0.993 |
| No CAD           |                  |        |                  |        |                  |       |
| Monday           | 1.1 (1.08-1.12)  | <0.001 | 1.14 (1.12-1.17) | <0.001 | 1.04 (1.02-1.07) | 0.993 |
| Tuesday          | 1.02 (1-1.04)    | 1.000  | 1.04 (1.02-1.06) | 0.161  | 0.99 (0.96-1.02) | 0.993 |
| Wednesday        | 1.02 (1.01-1.04) | 1.000  | 1.05 (1.03-1.08) | 0.003  | 0.98 (0.96-1.01) | 0.993 |
| Thursday         | 1.02 (1-1.04)    | 1.000  | 1.05 (1.02-1.07) | 0.019  | 0.99 (0.96-1.01) | 0.993 |
| Friday           | 1.01 (0.99-1.03) | 1.000  | 1.03 (1-1.05)    | 0.003  | 0.98 (0.96-1.01) | 0.993 |
| Saturday         | 0.97 (0.96-0.99) | 0.805  | 0.97 (0.95-0.99) | 0.998  | 0.98 (0.95-1.01) | 0.993 |
| Beta-blockers    |                  |        |                  |        |                  |       |
| Monday           | 1.1 (1.07-1.12)  | <0.001 | 1.1 (1.07-1.13)  | <0.001 | 1.09 (1.04-1.13) | 0.107 |
| Tuesday          | 1.04 (1.02-1.06) | 0.237  | 1.04 (1.01-1.07) | 0.603  | 1.03 (0.99-1.08) | 0.993 |
| Wednesday        | 1.05 (1.03-1.07) | 0.007  | 1.05 (1.02-1.08) | 0.035  | 1.04 (1-1.09)    | 0.993 |
| Thursday         | 1.06 (1.03-1.08) | <0.001 | 1.06 (1.04-1.09) | <0.001 | 1.04 (0.99-1.08) | 0.993 |
| Friday           | 1.05 (1.03-1.07) | 0.009  | 1.05 (1.02-1.08) | 0.035  | 1.04 (0.99-1.08) | 0.993 |
| Saturday         | 0.99 (0.97-1.02) | 1.000  | 0.99 (0.97-1.02) | 0.998  | 1 (0.96-1.05)    | 0.993 |
| No Beta-blockers |                  |        |                  |        |                  |       |
| Monday           | 1.09 (1.07-1.11) | <0.001 | 1.13 (1.1-1.16)  | <0.001 | 1.04 (1.01-1.07) | 0.993 |
| Tuesday          | 1.01 (0.99-1.02) | 1.000  | 1.03 (1-1.05)    | 0.998  | 0.98 (0.95-1)    | 0.993 |
| Wednesday        | 1.01 (0.99-1.02) | 1.000  | 1.03 (1.01-1.06) | 0.998  | 0.97 (0.94-1)    | 0.993 |
| Thursday         | 1.01 (0.99-1.03) | 1.000  | 1.03 (1.01-1.06) | 0.998  | 0.98 (0.95-1)    | 0.993 |
| Friday           | 1 (0.98-1.02)    | 1.000  | 1.02 (1-1.04)    | 0.998  | 0.97 (0.95-1)    | 0.993 |
| Saturday         | 0.96 (0.95-0.98) | 0.056  | 0.96 (0.93-0.98) | 0.149  | 0.98 (0.95-1)    | 0.993 |
| Ca-inhibitors    |                  |        |                  |        |                  |       |
| Monday           | 1.06 (1.03-1.1)  | 0.058  | 1.07 (1.03-1.11) | 0.218  | 1.06 (0.99-1.12) | 0.993 |
| Tuesday          | 1.01 (0.97-1.04) | 1.000  | 1.01 (0.97-1.05) | 0.998  | 1 (0.94-1.07)    | 0.993 |
| Wednesday        | 1.02 (0.98-1.05) | 1.000  | 1.02 (0.98-1.06) | 0.998  | 1.02 (0.96-1.09) | 0.993 |
| Thursday         | 1.04 (1-1.07)    | 1.000  | 1.05 (1.01-1.09) | 0.998  | 1.01 (0.95-1.07) | 0.993 |
| Friday           | 1.04 (1-1.07)    | 1.000  | 1.04 (1-1.08)    | 0.998  | 1.02 (0.96-1.09) | 0.993 |
| Saturday         | 0.98 (0.95-1.01) | 1.000  | 0.98 (0.95-1.02) | 0.998  | 0.96 (0.9-1.03)  | 0.993 |
| No Ca-inhibitors |                  |        |                  |        |                  |       |
| Monday           | 1.1 (1.08-1.12)  | <0.001 | 1.13 (1.11-1.15) | <0.001 | 1.05 (1.02-1.08) | 0.104 |
| Tuesday          | 1.02 (1.01-1.04) | 1.000  | 1.04 (1.02-1.06) | 0.027  | 0.99 (0.97-1.02) | 0.993 |
| Wednesday        | 1.03 (1.01-1.04) | 0.510  | 1.05 (1.03-1.07) | 0.001  | 0.99 (0.96-1.01) | 0.993 |
| Thursday         | 1.03 (1.01-1.04) | 0.200  | 1.05 (1.03-1.07) | 0.001  | 0.99 (0.97-1.02) | 0.993 |
| Friday           | 1.02 (1-1.03)    | 1.000  | 1.03 (1.01-1.05) | 0.001  | 0.99 (0.96-1.01) | 0.993 |
| Saturday         | 0.98 (0.96-0.99) | 0.834  | 0.97 (0.95-0.99) | 0.807  | 0.99 (0.96-1.01) | 0.993 |
| Aspirin          |                  |        |                  |        |                  |       |
| Monday           | 1.09 (1.07-1.11) | <0.001 | 1.09 (1.07-1.12) | <0.001 | 1.07 (1.03-1.12) | 0.709 |
| Tuesday          | 1.04 (1.01-1.06) | 0.401  | 1.04 (1.02-1.07) | 0.483  | 1.02 (0.98-1.07) | 0.993 |

|              |                  |        |                  |        |                  |        |
|--------------|------------------|--------|------------------|--------|------------------|--------|
| Wednesday    | 1.04 (1.02-1.06) | 0.045  | 1.05 (1.02-1.07) | 0.044  | 1.02 (0.98-1.07) | 0.993  |
| Thursday     | 1.06 (1.04-1.08) | <0.001 | 1.06 (1.04-1.09) | 0.001  | 1.06 (1.01-1.1)  | 0.993  |
| Friday       | 1.05 (1.03-1.07) | 0.002  | 1.05 (1.03-1.08) | 0.044  | 1.04 (0.99-1.08) | 0.993  |
| Saturday     | 0.98 (0.96-1.01) | 1.000  | 0.98 (0.96-1.01) | 0.998  | 0.99 (0.94-1.03) | 0.993  |
| No Aspirin   |                  |        |                  |        |                  |        |
| Monday       | 1.1 (1.08-1.12)  | <0.001 | 1.14 (1.11-1.16) | <0.001 | 1.04 (1.01-1.07) | 0.993  |
| Tuesday      | 1.01 (0.99-1.03) | 1.000  | 1.03 (1-1.05)    | 0.998  | 0.98 (0.95-1.01) | 0.993  |
| Wednesday    | 1.01 (0.99-1.03) | 1.000  | 1.03 (1.01-1.06) | 0.998  | 0.98 (0.95-1)    | 0.993  |
| Thursday     | 1.01 (0.99-1.02) | 1.000  | 1.03 (1.01-1.06) | 0.998  | 0.97 (0.94-0.99) | 0.993  |
| Friday       | 1 (0.98-1.02)    | 1.000  | 1.01 (0.99-1.04) | 0.998  | 0.97 (0.95-1)    | 0.993  |
| Saturday     | 0.97 (0.95-0.99) | 0.670  | 0.96 (0.94-0.99) | 0.718  | 0.98 (0.96-1.01) | 0.993  |
| ACE-I/ARB    |                  |        |                  |        |                  |        |
| Monday       | 1.1 (1.07-1.12)  | <0.001 | 1.1 (1.07-1.13)  | <0.001 | 1.07 (1.02-1.13) | 0.993  |
| Tuesday      | 1.04 (1.02-1.07) | 0.505  | 1.03 (1-1.06)    | 0.998  | 1.07 (1.02-1.12) | 0.993  |
| Wednesday    | 1.04 (1.01-1.06) | 1.000  | 1.04 (1.01-1.07) | 0.998  | 1.03 (0.98-1.08) | 0.993  |
| Thursday     | 1.04 (1.02-1.07) | 0.327  | 1.05 (1.02-1.08) | 0.152  | 1.01 (0.96-1.07) | 0.993  |
| Friday       | 1.03 (1-1.06)    | 1.000  | 1.03 (1.01-1.06) | 0.998  | 1.01 (0.96-1.07) | 0.993  |
| Saturday     | 0.98 (0.96-1.01) | 1.000  | 0.98 (0.96-1.01) | 0.998  | 0.98 (0.93-1.03) | 0.993  |
| No ACE-I/ARB |                  |        |                  |        |                  |        |
| Monday       | 1.09 (1.07-1.11) | <0.001 | 1.12 (1.1-1.15)  | <0.001 | 1.05 (1.02-1.07) | 0.756  |
| Tuesday      | 1.01 (0.99-1.03) | 1.000  | 1.03 (1.01-1.06) | 0.814  | 0.97 (0.95-1)    | 0.993  |
| Wednesday    | 1.02 (1-1.04)    | 1.000  | 1.04 (1.02-1.07) | 0.040  | 0.98 (0.95-1.01) | 0.993  |
| Thursday     | 1.02 (1.01-1.04) | 1.000  | 1.05 (1.02-1.07) | 0.018  | 0.99 (0.96-1.02) | 0.993  |
| Friday       | 1.02 (1-1.03)    | 1.000  | 1.03 (1.01-1.06) | 0.040  | 0.99 (0.96-1.01) | 0.993  |
| Saturday     | 0.97 (0.96-0.99) | 0.805  | 0.97 (0.95-0.99) | 0.998  | 0.98 (0.96-1.01) | 0.993  |
| Statins      |                  |        |                  |        |                  |        |
| Monday       | 1.09 (1.06-1.12) | <0.001 | 1.11 (1.07-1.14) | <0.001 | 1.05 (0.99-1.11) | 0.993  |
| Tuesday      | 1.05 (1.02-1.08) | 0.153  | 1.05 (1.02-1.08) | 0.398  | 1.04 (0.99-1.1)  | 0.993  |
| Wednesday    | 1.04 (1.02-1.07) | 0.548  | 1.05 (1.02-1.08) | 0.938  | 1.03 (0.98-1.09) | 0.993  |
| Thursday     | 1.05 (1.03-1.08) | 0.051  | 1.06 (1.03-1.1)  | 0.042  | 1.03 (0.97-1.09) | 0.993  |
| Friday       | 1.05 (1.02-1.08) | 0.099  | 1.06 (1.03-1.1)  | 0.938  | 1.01 (0.95-1.07) | 0.993  |
| Saturday     | 0.98 (0.95-1)    | 1.000  | 0.97 (0.94-1)    | 0.998  | 0.99 (0.94-1.05) | 0.993  |
| No Statins   |                  |        |                  |        |                  |        |
| Monday       | 1.09 (1.08-1.11) | <0.001 | 1.12 (1.1-1.14)  | <0.001 | 1.05 (1.02-1.08) | 0.100  |
| Tuesday      | 1.01 (0.99-1.02) | 1.000  | 1.02 (1-1.05)    | 0.998  | 0.98 (0.96-1.01) | 0.993  |
| Wednesday    | 1.02 (1-1.03)    | 1.000  | 1.04 (1.02-1.06) | 0.111  | 0.98 (0.96-1.01) | 0.993  |
| Thursday     | 1.02 (1-1.04)    | 1.000  | 1.04 (1.02-1.06) | 0.041  | 0.99 (0.96-1.01) | 0.993  |
| Friday       | 1.01 (0.99-1.03) | 1.000  | 1.02 (1-1.04)    | 0.111  | 0.99 (0.96-1.02) | 0.993  |
| Saturday     | 0.98 (0.96-0.99) | 1.000  | 0.97 (0.95-0.99) | 0.998  | 0.98 (0.96-1.01) | 0.993  |
| Men          |                  |        |                  |        |                  |        |
|              |                  | 1      |                  | 1      |                  | 1      |
| 01:00        | 0.89 (0.86-0.93) | <0.001 | 0.88 (0.84-0.92) | <0.001 | 1.01 (0.95-1.08) | 0.993  |
| 02:00        | 0.94 (0.91-0.98) | 0.406  | 0.92 (0.88-0.96) | 0.030  | 1.07 (1-1.14)    | 0.993  |
| 03:00        | 0.93 (0.9-0.97)  | 0.042  | 0.9 (0.86-0.94)  | 0.001  | 1.05 (0.99-1.12) | 0.993  |
| 04:00        | 0.88 (0.85-0.91) | <0.001 | 0.86 (0.82-0.89) | <0.001 | 1.04 (0.98-1.11) | 0.993  |
| 05:00        | 0.85 (0.82-0.88) | <0.001 | 0.82 (0.78-0.86) | <0.001 | 1.04 (0.98-1.11) | 0.993  |
| 06:00        | 0.96 (0.92-0.99) | 1.000  | 0.9 (0.86-0.94)  | 0.001  | 1.06 (1-1.13)    | 0.993  |
| 07:00        | 1.12 (1.09-1.16) | <0.001 | 1.03 (0.99-1.07) | 0.998  | 1.15 (1.08-1.22) | 0.004  |
| 08:00        | 1.63 (1.58-1.68) | <0.001 | 1.45 (1.4-1.5)   | <0.001 | 1.33 (1.26-1.4)  | <0.001 |



|          |       |                  |        |                  |        |                  |        |
|----------|-------|------------------|--------|------------------|--------|------------------|--------|
|          | 09:00 | 1.24 (1.2-1.28)  | <0.001 | 1.1 (1.05-1.14)  | 0.003  | 1.26 (1.19-1.33) | <0.001 |
|          | 10:00 | 1.33 (1.28-1.37) | <0.001 | 1.14 (1.1-1.19)  | <0.001 | 1.32 (1.25-1.39) | <0.001 |
|          | 11:00 | 1.08 (1.05-1.12) | 0.001  | 0.96 (0.92-1)    | 0.998  | 1.25 (1.18-1.33) | <0.001 |
|          | 12:00 | 1.28 (1.24-1.32) | <0.001 | 1.15 (1.1-1.19)  | <0.001 | 1.25 (1.18-1.32) | <0.001 |
|          | 13:00 | 0.97 (0.94-1.01) | 1.000  | 0.88 (0.84-0.92) | <0.001 | 1.17 (1.1-1.24)  | <0.001 |
|          | 14:00 | 1.01 (0.98-1.05) | 1.000  | 0.92 (0.88-0.96) | 0.035  | 1.16 (1.1-1.24)  | <0.001 |
|          | 15:00 | 1.02 (0.98-1.05) | 1.000  | 0.94 (0.9-0.98)  | 0.998  | 1.12 (1.05-1.18) | 0.238  |
|          | 16:00 | 0.93 (0.9-0.96)  | 0.016  | 0.87 (0.83-0.91) | <0.001 | 1.1 (1.04-1.17)  | 0.993  |
|          | 17:00 | 0.86 (0.83-0.89) | <0.001 | 0.81 (0.77-0.85) | <0.001 | 1.06 (1-1.13)    | 0.993  |
|          | 18:00 | 0.88 (0.85-0.92) | <0.001 | 0.85 (0.81-0.89) | <0.001 | 1.03 (0.97-1.1)  | 0.993  |
|          | 19:00 | 0.85 (0.82-0.88) | <0.001 | 0.82 (0.78-0.86) | <0.001 | 1.02 (0.95-1.08) | 0.993  |
|          | 20:00 | 0.94 (0.91-0.98) | 0.433  | 0.92 (0.88-0.96) | 0.023  | 1 (0.94-1.07)    | 0.993  |
|          | 21:00 | 0.87 (0.84-0.91) | <0.001 | 0.85 (0.81-0.88) | <0.001 | 1.01 (0.94-1.07) | 0.993  |
|          | 22:00 | 0.93 (0.89-0.96) | 0.006  | 0.9 (0.86-0.94)  | <0.001 | 1.01 (0.95-1.07) | 0.993  |
|          | 23:00 | 0.96 (0.92-0.99) | 1.000  | 0.93 (0.89-0.97) | 0.113  | 1.07 (1.01-1.14) | 0.993  |
| Women    |       |                  | 1      |                  | 1      |                  | 1      |
|          | 01:00 | 0.87 (0.83-0.91) | <0.001 | 0.88 (0.83-0.93) | 0.004  | 0.93 (0.85-1.02) | 0.993  |
|          | 02:00 | 0.87 (0.83-0.91) | <0.001 | 0.88 (0.83-0.93) | 0.001  | 0.92 (0.84-1)    | 0.993  |
|          | 03:00 | 0.87 (0.83-0.91) | <0.001 | 0.86 (0.82-0.91) | <0.001 | 0.95 (0.87-1.03) | 0.993  |
|          | 04:00 | 0.83 (0.79-0.87) | <0.001 | 0.85 (0.8-0.9)   | <0.001 | 0.91 (0.83-0.99) | 0.993  |
|          | 05:00 | 0.79 (0.75-0.83) | <0.001 | 0.8 (0.76-0.85)  | <0.001 | 0.9 (0.82-0.98)  | 0.993  |
|          | 06:00 | 0.93 (0.89-0.98) | 0.820  | 0.9 (0.86-0.95)  | 0.107  | 1 (0.92-1.09)    | 0.993  |
|          | 07:00 | 1.05 (1-1.09)    | 1.000  | 0.98 (0.93-1.04) | 0.998  | 1.03 (0.96-1.12) | 0.993  |
|          | 08:00 | 1.51 (1.45-1.57) | <0.001 | 1.37 (1.31-1.43) | <0.001 | 1.19 (1.1-1.28)  | 0.004  |
|          | 09:00 | 1.05 (1.01-1.1)  | 1.000  | 0.95 (0.9-1)     | 0.998  | 1.06 (0.98-1.14) | 0.993  |
|          | 10:00 | 1.1 (1.05-1.14)  | 0.010  | 0.97 (0.93-1.03) | 0.998  | 1.06 (0.98-1.15) | 0.993  |
|          | 11:00 | 0.85 (0.82-0.89) | <0.001 | 0.79 (0.74-0.83) | <0.001 | 0.96 (0.89-1.04) | 0.993  |
|          | 12:00 | 1.14 (1.09-1.19) | <0.001 | 1.06 (1.01-1.12) | 0.998  | 1.06 (0.98-1.14) | 0.993  |
|          | 13:00 | 0.81 (0.77-0.85) | <0.001 | 0.8 (0.75-0.84)  | <0.001 | 0.88 (0.81-0.95) | 0.993  |
|          | 14:00 | 0.87 (0.83-0.91) | <0.001 | 0.84 (0.79-0.89) | <0.001 | 0.93 (0.85-1.01) | 0.993  |
|          | 15:00 | 0.97 (0.93-1.02) | 1.000  | 0.93 (0.88-0.98) | 0.998  | 1.03 (0.95-1.11) | 0.993  |
|          | 16:00 | 0.86 (0.83-0.91) | <0.001 | 0.86 (0.81-0.91) | <0.001 | 0.95 (0.87-1.03) | 0.993  |
|          | 17:00 | 0.83 (0.79-0.87) | <0.001 | 0.86 (0.81-0.91) | <0.001 | 0.9 (0.82-0.98)  | 0.993  |
|          | 18:00 | 0.9 (0.86-0.94)  | 0.003  | 0.9 (0.85-0.95)  | 0.044  | 1 (0.92-1.09)    | 0.993  |
|          | 19:00 | 0.87 (0.83-0.91) | <0.001 | 0.88 (0.83-0.93) | 0.002  | 0.97 (0.89-1.06) | 0.993  |
|          | 20:00 | 1.03 (0.99-1.08) | 1.000  | 1.03 (0.98-1.08) | 0.998  | 1.04 (0.95-1.13) | 0.993  |
|          | 21:00 | 0.91 (0.87-0.96) | 0.050  | 0.93 (0.88-0.98) | 0.998  | 0.96 (0.88-1.05) | 0.993  |
|          | 22:00 | 0.98 (0.94-1.03) | 1.000  | 0.98 (0.93-1.03) | 0.998  | 1.01 (0.93-1.1)  | 0.993  |
|          | 23:00 | 0.89 (0.85-0.94) | 0.001  | 0.91 (0.86-0.96) | 0.130  | 0.91 (0.83-0.99) | 0.993  |
| Age≥75yo |       |                  | 1      |                  | 1      |                  | 1      |
|          | 01:00 | 0.87 (0.83-0.9)  | <0.001 | 0.88 (0.84-0.93) | <0.001 | 0.93 (0.86-1.01) | 0.993  |
|          | 02:00 | 0.9 (0.87-0.94)  | <0.001 | 0.91 (0.87-0.96) | 0.044  | 0.96 (0.89-1.05) | 0.993  |
|          | 03:00 | 0.89 (0.86-0.93) | <0.001 | 0.9 (0.86-0.94)  | 0.003  | 0.94 (0.87-1.03) | 0.993  |
|          | 04:00 | 0.83 (0.79-0.86) | <0.001 | 0.85 (0.81-0.89) | <0.001 | 0.91 (0.84-0.99) | 0.993  |
|          | 05:00 | 0.8 (0.77-0.84)  | <0.001 | 0.81 (0.78-0.86) | <0.001 | 0.95 (0.88-1.03) | 0.993  |
|          | 06:00 | 0.91 (0.88-0.95) | 0.004  | 0.9 (0.86-0.95)  | 0.005  | 0.98 (0.91-1.06) | 0.993  |
|          | 07:00 | 1.02 (0.98-1.06) | 1.000  | 0.97 (0.92-1.01) | 0.998  | 1.04 (0.96-1.12) | 0.993  |
|          | 08:00 | 1.53 (1.48-1.58) | <0.001 | 1.35 (1.3-1.41)  | <0.001 | 1.34 (1.25-1.43) | <0.001 |
|          | 09:00 | 1.01 (0.97-1.04) | 1.000  | 0.9 (0.86-0.94)  | 0.002  | 1.1 (1.02-1.19)  | 0.993  |

|                |       |                  |        |                  |        |                  |        |
|----------------|-------|------------------|--------|------------------|--------|------------------|--------|
|                | 10:00 | 1.05 (1.02-1.09) | 1.000  | 0.93 (0.89-0.97) | 0.423  | 1.11 (1.04-1.2)  | 0.993  |
|                | 11:00 | 0.81 (0.78-0.84) | <0.001 | 0.74 (0.7-0.77)  | <0.001 | 1.03 (0.95-1.11) | 0.993  |
|                | 12:00 | 1.06 (1.02-1.1)  | 0.505  | 0.97 (0.93-1.01) | 0.998  | 1.09 (1.02-1.18) | 0.993  |
|                | 13:00 | 0.75 (0.72-0.78) | <0.001 | 0.72 (0.69-0.76) | <0.001 | 0.9 (0.83-0.98)  | 0.993  |
|                | 14:00 | 0.79 (0.75-0.82) | <0.001 | 0.75 (0.71-0.78) | <0.001 | 0.92 (0.85-0.99) | 0.993  |
|                | 15:00 | 0.85 (0.82-0.88) | <0.001 | 0.81 (0.77-0.84) | <0.001 | 0.98 (0.91-1.06) | 0.993  |
|                | 16:00 | 0.77 (0.74-0.81) | <0.001 | 0.75 (0.72-0.79) | <0.001 | 0.94 (0.87-1.02) | 0.993  |
|                | 17:00 | 0.73 (0.7-0.77)  | <0.001 | 0.74 (0.71-0.78) | <0.001 | 0.87 (0.8-0.95)  | 0.897  |
|                | 18:00 | 0.81 (0.78-0.84) | <0.001 | 0.81 (0.77-0.85) | <0.001 | 0.94 (0.87-1.02) | 0.993  |
|                | 19:00 | 0.76 (0.73-0.79) | <0.001 | 0.76 (0.72-0.8)  | <0.001 | 0.91 (0.83-0.99) | 0.993  |
|                | 20:00 | 0.93 (0.89-0.96) | 0.054  | 0.93 (0.89-0.97) | 0.252  | 0.95 (0.88-1.03) | 0.993  |
|                | 21:00 | 0.87 (0.84-0.91) | <0.001 | 0.88 (0.84-0.92) | <0.001 | 0.95 (0.87-1.03) | 0.993  |
|                | 22:00 | 0.92 (0.88-0.95) | 0.004  | 0.91 (0.87-0.95) | 0.018  | 0.97 (0.89-1.05) | 0.993  |
|                | 23:00 | 0.89 (0.85-0.92) | <0.001 | 0.92 (0.88-0.96) | 0.060  | 0.86 (0.79-0.94) | 0.431  |
| Age<75yo       |       |                  | 1      |                  | 1      |                  | 1      |
|                | 01:00 | 0.9 (0.87-0.94)  | <0.001 | 0.88 (0.83-0.92) | <0.001 | 1.02 (0.95-1.09) | 0.993  |
|                | 02:00 | 0.93 (0.89-0.97) | 0.096  | 0.89 (0.85-0.93) | 0.001  | 1.05 (0.98-1.12) | 0.993  |
|                | 03:00 | 0.93 (0.89-0.96) | 0.081  | 0.87 (0.83-0.91) | <0.001 | 1.06 (1-1.14)    | 0.993  |
|                | 04:00 | 0.89 (0.86-0.93) | <0.001 | 0.86 (0.81-0.9)  | <0.001 | 1.05 (0.98-1.12) | 0.993  |
|                | 05:00 | 0.85 (0.82-0.89) | <0.001 | 0.81 (0.76-0.85) | <0.001 | 1.02 (0.95-1.09) | 0.993  |
|                | 06:00 | 0.98 (0.94-1.02) | 1.000  | 0.9 (0.86-0.95)  | 0.013  | 1.08 (1.01-1.15) | 0.993  |
|                | 07:00 | 1.17 (1.13-1.21) | <0.001 | 1.07 (1.02-1.12) | 0.969  | 1.15 (1.08-1.22) | 0.005  |
|                | 08:00 | 1.64 (1.58-1.69) | <0.001 | 1.5 (1.44-1.56)  | <0.001 | 1.24 (1.17-1.31) | <0.001 |
|                | 09:00 | 1.34 (1.29-1.39) | <0.001 | 1.21 (1.15-1.26) | <0.001 | 1.24 (1.17-1.31) | <0.001 |
|                | 10:00 | 1.43 (1.38-1.48) | <0.001 | 1.25 (1.2-1.31)  | <0.001 | 1.3 (1.23-1.38)  | <0.001 |
|                | 11:00 | 1.19 (1.14-1.23) | <0.001 | 1.08 (1.03-1.13) | 0.714  | 1.23 (1.16-1.3)  | <0.001 |
|                | 12:00 | 1.39 (1.35-1.44) | <0.001 | 1.29 (1.23-1.35) | <0.001 | 1.24 (1.17-1.31) | <0.001 |
|                | 13:00 | 1.08 (1.04-1.12) | 0.033  | 0.99 (0.94-1.04) | 0.998  | 1.17 (1.1-1.25)  | <0.001 |
|                | 14:00 | 1.14 (1.1-1.18)  | <0.001 | 1.06 (1.01-1.11) | 0.998  | 1.19 (1.12-1.26) | <0.001 |
|                | 15:00 | 1.15 (1.11-1.19) | <0.001 | 1.09 (1.04-1.15) | 0.071  | 1.15 (1.09-1.23) | 0.003  |
|                | 16:00 | 1.04 (1-1.08)    | 1.000  | 1 (0.95-1.05)    | 0.998  | 1.12 (1.05-1.19) | 0.434  |
|                | 17:00 | 0.96 (0.93-1)    | 1.000  | 0.93 (0.88-0.97) | 0.998  | 1.09 (1.02-1.16) | 0.993  |
|                | 18:00 | 0.97 (0.93-1.01) | 1.000  | 0.94 (0.89-0.99) | 0.998  | 1.07 (1.01-1.14) | 0.993  |
|                | 19:00 | 0.96 (0.92-0.99) | 1.000  | 0.94 (0.89-0.99) | 0.998  | 1.06 (1-1.13)    | 0.993  |
|                | 20:00 | 1.03 (0.99-1.07) | 1.000  | 1 (0.96-1.05)    | 0.998  | 1.06 (0.99-1.13) | 0.993  |
|                | 21:00 | 0.91 (0.87-0.95) | 0.002  | 0.88 (0.84-0.92) | <0.001 | 1.02 (0.95-1.09) | 0.993  |
|                | 22:00 | 0.98 (0.94-1.02) | 1.000  | 0.95 (0.91-1)    | 0.998  | 1.04 (0.97-1.11) | 0.993  |
|                | 23:00 | 0.98 (0.94-1.02) | 1.000  | 0.92 (0.88-0.97) | 0.323  | 1.11 (1.04-1.19) | 0.718  |
| Current smoker |       |                  | 1      |                  | 1      |                  | 1      |
|                | 01:00 | 0.92 (0.87-0.98) | 1.000  | 0.88 (0.81-0.96) | 0.998  | 1.04 (0.94-1.15) | 0.993  |
|                | 02:00 | 0.96 (0.91-1.03) | 1.000  | 0.92 (0.84-0.99) | 0.998  | 1.07 (0.97-1.17) | 0.993  |
|                | 03:00 | 0.91 (0.86-0.97) | 1.000  | 0.88 (0.81-0.96) | 0.998  | 0.97 (0.88-1.08) | 0.993  |
|                | 04:00 | 0.86 (0.8-0.91)  | 0.002  | 0.82 (0.75-0.89) | 0.002  | 0.97 (0.88-1.08) | 0.993  |
|                | 05:00 | 0.86 (0.8-0.92)  | 0.002  | 0.81 (0.74-0.88) | 0.001  | 0.98 (0.88-1.08) | 0.993  |
|                | 06:00 | 0.92 (0.86-0.98) | 1.000  | 0.82 (0.75-0.89) | 0.001  | 1.01 (0.92-1.11) | 0.993  |
|                | 07:00 | 1.05 (0.99-1.12) | 1.000  | 0.98 (0.9-1.06)  | 0.998  | 0.98 (0.89-1.08) | 0.993  |
|                | 08:00 | 1.44 (1.36-1.52) | <0.001 | 1.31 (1.22-1.4)  | <0.001 | 1.09 (1-1.19)    | 0.993  |
|                | 09:00 | 1.14 (1.08-1.21) | 0.006  | 1.01 (0.94-1.09) | 0.998  | 1.04 (0.95-1.13) | 0.993  |
|                | 10:00 | 1.25 (1.18-1.32) | <0.001 | 1.11 (1.03-1.2)  | 0.998  | 1.07 (0.98-1.17) | 0.993  |

|            |       |                  |        |                  |        |                  |        |
|------------|-------|------------------|--------|------------------|--------|------------------|--------|
|            | 11:00 | 1.07 (1-1.13)    | 1.000  | 0.94 (0.86-1.02) | 0.998  | 1.07 (0.98-1.17) | 0.993  |
|            | 12:00 | 1.3 (1.22-1.37)  | <0.001 | 1.19 (1.1-1.28)  | 0.004  | 1.13 (1.04-1.24) | 0.993  |
|            | 13:00 | 1.03 (0.97-1.09) | 1.000  | 0.9 (0.83-0.98)  | 0.998  | 1.1 (1-1.21)     | 0.993  |
|            | 14:00 | 1.08 (1.02-1.15) | 1.000  | 0.96 (0.89-1.05) | 0.998  | 1.12 (1.02-1.23) | 0.993  |
|            | 15:00 | 1.1 (1.03-1.16)  | 0.864  | 0.97 (0.89-1.05) | 0.998  | 1.16 (1.05-1.27) | 0.993  |
|            | 16:00 | 0.96 (0.9-1.02)  | 1.000  | 0.88 (0.81-0.96) | 0.998  | 1.05 (0.95-1.15) | 0.993  |
|            | 17:00 | 0.95 (0.89-1.01) | 1.000  | 0.91 (0.83-0.99) | 0.998  | 1.03 (0.93-1.13) | 0.993  |
|            | 18:00 | 0.95 (0.89-1.01) | 1.000  | 0.9 (0.83-0.98)  | 0.998  | 1.05 (0.95-1.15) | 0.993  |
|            | 19:00 | 0.91 (0.85-0.97) | 0.874  | 0.88 (0.81-0.96) | 0.998  | 0.99 (0.9-1.09)  | 0.993  |
|            | 20:00 | 1.04 (0.98-1.1)  | 1.000  | 1.01 (0.93-1.09) | 0.998  | 1.06 (0.96-1.17) | 0.993  |
|            | 21:00 | 0.93 (0.88-1)    | 1.000  | 0.89 (0.82-0.97) | 0.998  | 1.04 (0.94-1.14) | 0.993  |
|            | 22:00 | 0.98 (0.92-1.04) | 1.000  | 0.95 (0.88-1.03) | 0.998  | 1.03 (0.93-1.13) | 0.993  |
|            | 23:00 | 0.99 (0.93-1.06) | 1.000  | 0.91 (0.84-0.99) | 0.998  | 1.13 (1.02-1.24) | 0.993  |
| Non-smoker |       |                  | 1      |                  | 1      |                  | 1      |
|            | 01:00 | 0.91 (0.88-0.94) | <0.001 | 0.91 (0.88-0.95) | 0.005  | 0.99 (0.93-1.06) | 0.993  |
|            | 02:00 | 0.93 (0.9-0.96)  | 0.016  | 0.93 (0.89-0.97) | 0.082  | 1.02 (0.96-1.09) | 0.993  |
|            | 03:00 | 0.94 (0.91-0.97) | 0.101  | 0.92 (0.88-0.95) | 0.007  | 1.06 (1-1.13)    | 0.993  |
|            | 04:00 | 0.89 (0.86-0.92) | <0.001 | 0.89 (0.85-0.92) | <0.001 | 1.04 (0.98-1.11) | 0.993  |
|            | 05:00 | 0.86 (0.83-0.89) | <0.001 | 0.84 (0.81-0.88) | <0.001 | 1.04 (0.97-1.1)  | 0.993  |
|            | 06:00 | 0.99 (0.96-1.03) | 1.000  | 0.96 (0.92-1)    | 0.998  | 1.09 (1.02-1.16) | 0.993  |
|            | 07:00 | 1.15 (1.12-1.19) | <0.001 | 1.06 (1.02-1.1)  | 0.434  | 1.21 (1.14-1.28) | <0.001 |
|            | 08:00 | 1.67 (1.63-1.72) | <0.001 | 1.49 (1.45-1.54) | <0.001 | 1.38 (1.3-1.45)  | <0.001 |
|            | 09:00 | 1.23 (1.2-1.27)  | <0.001 | 1.1 (1.06-1.14)  | 0.001  | 1.29 (1.22-1.37) | <0.001 |
|            | 10:00 | 1.29 (1.25-1.33) | <0.001 | 1.12 (1.08-1.16) | <0.001 | 1.32 (1.25-1.39) | <0.001 |
|            | 11:00 | 1.02 (0.99-1.05) | 1.000  | 0.92 (0.88-0.95) | 0.006  | 1.22 (1.15-1.29) | <0.001 |
|            | 12:00 | 1.24 (1.21-1.28) | <0.001 | 1.13 (1.09-1.18) | <0.001 | 1.22 (1.15-1.29) | <0.001 |
|            | 13:00 | 0.93 (0.9-0.96)  | 0.007  | 0.88 (0.84-0.92) | <0.001 | 1.09 (1.03-1.16) | 0.993  |
|            | 14:00 | 0.97 (0.94-1.01) | 1.000  | 0.91 (0.88-0.95) | 0.002  | 1.11 (1.04-1.17) | 0.519  |
|            | 15:00 | 1.01 (0.98-1.04) | 1.000  | 0.96 (0.92-1)    | 0.998  | 1.1 (1.03-1.16)  | 0.993  |
|            | 16:00 | 0.93 (0.9-0.96)  | 0.006  | 0.9 (0.87-0.94)  | <0.001 | 1.08 (1.01-1.14) | 0.993  |
|            | 17:00 | 0.85 (0.82-0.88) | <0.001 | 0.84 (0.8-0.87)  | <0.001 | 1.01 (0.95-1.08) | 0.993  |
|            | 18:00 | 0.9 (0.87-0.93)  | <0.001 | 0.89 (0.85-0.92) | <0.001 | 1.04 (0.97-1.1)  | 0.993  |
|            | 19:00 | 0.87 (0.84-0.9)  | <0.001 | 0.86 (0.83-0.9)  | <0.001 | 1.03 (0.97-1.1)  | 0.993  |
|            | 20:00 | 0.99 (0.96-1.02) | 1.000  | 0.98 (0.95-1.02) | 0.998  | 1.02 (0.95-1.08) | 0.993  |
|            | 21:00 | 0.91 (0.88-0.94) | <0.001 | 0.9 (0.87-0.94)  | <0.001 | 1 (0.94-1.07)    | 0.993  |
|            | 22:00 | 0.97 (0.94-1.01) | 1.000  | 0.96 (0.92-0.99) | 0.998  | 1.04 (0.98-1.11) | 0.993  |
|            | 23:00 | 0.95 (0.92-0.98) | 0.662  | 0.95 (0.91-0.99) | 0.998  | 1 (0.94-1.07)    | 0.993  |
| Diabetes   |       |                  | 1      |                  | 1      |                  | 1      |
|            | 01:00 | 0.84 (0.8-0.89)  | <0.001 | 0.85 (0.8-0.91)  | 0.002  | 0.92 (0.81-1.04) | 0.993  |
|            | 02:00 | 0.86 (0.82-0.91) | <0.001 | 0.89 (0.83-0.95) | 0.119  | 0.88 (0.78-1)    | 0.993  |
|            | 03:00 | 0.82 (0.77-0.87) | <0.001 | 0.82 (0.77-0.88) | <0.001 | 0.89 (0.79-1)    | 0.993  |
|            | 04:00 | 0.78 (0.74-0.83) | <0.001 | 0.79 (0.74-0.85) | <0.001 | 0.92 (0.81-1.04) | 0.993  |
|            | 05:00 | 0.74 (0.69-0.79) | <0.001 | 0.77 (0.71-0.82) | <0.001 | 0.84 (0.74-0.95) | 0.993  |
|            | 06:00 | 0.84 (0.8-0.89)  | <0.001 | 0.83 (0.78-0.89) | <0.001 | 0.91 (0.81-1.02) | 0.993  |
|            | 07:00 | 0.95 (0.9-1)     | 1.000  | 0.9 (0.84-0.96)  | 0.297  | 0.98 (0.87-1.09) | 0.993  |
|            | 08:00 | 1.41 (1.34-1.48) | <0.001 | 1.3 (1.23-1.37)  | <0.001 | 1.1 (0.99-1.22)  | 0.993  |
|            | 09:00 | 0.97 (0.92-1.02) | 1.000  | 0.91 (0.85-0.97) | 0.695  | 0.98 (0.88-1.09) | 0.993  |
|            | 10:00 | 1.01 (0.95-1.06) | 1.000  | 0.9 (0.85-0.96)  | 0.387  | 1.04 (0.94-1.16) | 0.993  |
|            | 11:00 | 0.74 (0.7-0.78)  | <0.001 | 0.7 (0.65-0.75)  | <0.001 | 0.88 (0.79-0.99) | 0.993  |

|              |       |                  |        |                  |        |                  |        |
|--------------|-------|------------------|--------|------------------|--------|------------------|--------|
|              | 12:00 | 1.01 (0.96-1.06) | 1.000  | 0.96 (0.9-1.02)  | 0.998  | 0.95 (0.85-1.06) | 0.993  |
|              | 13:00 | 0.71 (0.67-0.76) | <0.001 | 0.69 (0.64-0.74) | <0.001 | 0.86 (0.76-0.96) | 0.993  |
|              | 14:00 | 0.77 (0.73-0.82) | <0.001 | 0.77 (0.72-0.82) | <0.001 | 0.82 (0.73-0.93) | 0.761  |
|              | 15:00 | 0.81 (0.77-0.86) | <0.001 | 0.8 (0.75-0.86)  | <0.001 | 0.87 (0.77-0.98) | 0.993  |
|              | 16:00 | 0.73 (0.68-0.77) | <0.001 | 0.75 (0.7-0.81)  | <0.001 | 0.76 (0.67-0.86) | 0.010  |
|              | 17:00 | 0.73 (0.68-0.77) | <0.001 | 0.74 (0.69-0.8)  | <0.001 | 0.85 (0.76-0.96) | 0.993  |
|              | 18:00 | 0.8 (0.75-0.85)  | <0.001 | 0.8 (0.75-0.86)  | <0.001 | 0.92 (0.82-1.04) | 0.993  |
|              | 19:00 | 0.77 (0.72-0.81) | <0.001 | 0.77 (0.72-0.83) | <0.001 | 0.9 (0.8-1.01)   | 0.993  |
|              | 20:00 | 0.96 (0.91-1.01) | 1.000  | 0.97 (0.91-1.03) | 0.998  | 0.95 (0.85-1.07) | 0.993  |
|              | 21:00 | 0.86 (0.81-0.91) | <0.001 | 0.87 (0.82-0.93) | 0.016  | 0.91 (0.8-1.02)  | 0.993  |
|              | 22:00 | 0.9 (0.85-0.96)  | 0.158  | 0.92 (0.86-0.98) | 0.998  | 0.89 (0.79-1)    | 0.993  |
|              | 23:00 | 0.89 (0.84-0.94) | 0.032  | 0.91 (0.86-0.97) | 0.998  | 0.89 (0.79-1)    | 0.993  |
| No Diabetes  |       |                  | 1      |                  | 1      |                  | 1      |
|              | 01:00 | 0.9 (0.87-0.93)  | <0.001 | 0.89 (0.86-0.93) | <0.001 | 1 (0.94-1.06)    | 0.993  |
|              | 02:00 | 0.93 (0.91-0.97) | 0.017  | 0.91 (0.88-0.95) | 0.002  | 1.04 (0.99-1.1)  | 0.993  |
|              | 03:00 | 0.94 (0.91-0.97) | 0.061  | 0.91 (0.88-0.95) | 0.002  | 1.04 (0.99-1.1)  | 0.993  |
|              | 04:00 | 0.89 (0.86-0.92) | <0.001 | 0.88 (0.84-0.91) | <0.001 | 1.01 (0.96-1.07) | 0.993  |
|              | 05:00 | 0.86 (0.83-0.89) | <0.001 | 0.83 (0.8-0.87)  | <0.001 | 1.02 (0.97-1.08) | 0.993  |
|              | 06:00 | 0.98 (0.95-1.02) | 1.000  | 0.93 (0.9-0.97)  | 0.137  | 1.07 (1.01-1.13) | 0.993  |
|              | 07:00 | 1.15 (1.11-1.18) | <0.001 | 1.06 (1.02-1.1)  | 0.527  | 1.14 (1.08-1.2)  | 0.001  |
|              | 08:00 | 1.65 (1.6-1.69)  | <0.001 | 1.47 (1.42-1.52) | <0.001 | 1.32 (1.26-1.39) | <0.001 |
|              | 09:00 | 1.24 (1.2-1.28)  | <0.001 | 1.09 (1.05-1.13) | 0.001  | 1.23 (1.17-1.3)  | <0.001 |
|              | 10:00 | 1.32 (1.28-1.36) | <0.001 | 1.15 (1.11-1.19) | <0.001 | 1.27 (1.21-1.33) | <0.001 |
|              | 11:00 | 1.08 (1.05-1.12) | <0.001 | 0.97 (0.93-1)    | 0.998  | 1.21 (1.15-1.27) | <0.001 |
|              | 12:00 | 1.3 (1.26-1.34)  | <0.001 | 1.18 (1.14-1.22) | <0.001 | 1.23 (1.17-1.3)  | <0.001 |
|              | 13:00 | 0.98 (0.95-1.01) | 1.000  | 0.9 (0.87-0.94)  | <0.001 | 1.11 (1.06-1.18) | 0.050  |
|              | 14:00 | 1.03 (0.99-1.06) | 1.000  | 0.94 (0.9-0.97)  | 0.373  | 1.14 (1.08-1.2)  | 0.001  |
|              | 15:00 | 1.06 (1.03-1.1)  | 0.050  | 0.99 (0.96-1.03) | 0.998  | 1.13 (1.07-1.2)  | 0.003  |
|              | 16:00 | 0.97 (0.93-1)    | 1.000  | 0.91 (0.88-0.95) | 0.002  | 1.11 (1.05-1.18) | 0.088  |
|              | 17:00 | 0.89 (0.86-0.92) | <0.001 | 0.86 (0.82-0.89) | <0.001 | 1.04 (0.98-1.09) | 0.993  |
|              | 18:00 | 0.92 (0.89-0.95) | <0.001 | 0.9 (0.86-0.93)  | <0.001 | 1.04 (0.99-1.1)  | 0.993  |
|              | 19:00 | 0.89 (0.86-0.92) | <0.001 | 0.87 (0.83-0.9)  | <0.001 | 1.02 (0.96-1.08) | 0.993  |
|              | 20:00 | 0.99 (0.96-1.02) | 1.000  | 0.96 (0.93-1)    | 0.998  | 1.03 (0.97-1.09) | 0.993  |
|              | 21:00 | 0.9 (0.87-0.93)  | <0.001 | 0.88 (0.85-0.92) | <0.001 | 1.01 (0.95-1.07) | 0.993  |
|              | 22:00 | 0.96 (0.93-0.99) | 1.000  | 0.93 (0.9-0.97)  | 0.157  | 1.04 (0.98-1.1)  | 0.993  |
|              | 23:00 | 0.95 (0.92-0.98) | 0.389  | 0.92 (0.89-0.96) | 0.018  | 1.04 (0.98-1.1)  | 0.993  |
| Hypertension |       |                  | 1      |                  | 1      |                  | 1      |
|              | 01:00 | 0.88 (0.84-0.91) | <0.001 | 0.9 (0.86-0.94)  | 0.006  | 0.91 (0.84-0.99) | 0.993  |
|              | 02:00 | 0.89 (0.86-0.93) | <0.001 | 0.9 (0.86-0.95)  | 0.011  | 0.95 (0.88-1.03) | 0.993  |
|              | 03:00 | 0.89 (0.85-0.93) | <0.001 | 0.88 (0.84-0.92) | <0.001 | 0.98 (0.9-1.06)  | 0.993  |
|              | 04:00 | 0.82 (0.78-0.85) | <0.001 | 0.82 (0.78-0.86) | <0.001 | 0.95 (0.87-1.03) | 0.993  |
|              | 05:00 | 0.78 (0.75-0.82) | <0.001 | 0.76 (0.73-0.81) | <0.001 | 0.98 (0.9-1.06)  | 0.993  |
|              | 06:00 | 0.91 (0.87-0.95) | 0.002  | 0.89 (0.84-0.93) | <0.001 | 0.98 (0.91-1.06) | 0.993  |
|              | 07:00 | 1 (0.97-1.04)    | 1.000  | 0.94 (0.9-0.99)  | 0.998  | 1.02 (0.95-1.1)  | 0.993  |
|              | 08:00 | 1.49 (1.44-1.55) | <0.001 | 1.36 (1.31-1.42) | <0.001 | 1.18 (1.1-1.26)  | 0.003  |
|              | 09:00 | 1.05 (1.01-1.09) | 1.000  | 0.96 (0.92-1.01) | 0.998  | 1.06 (0.99-1.14) | 0.993  |
|              | 10:00 | 1.1 (1.06-1.15)  | <0.001 | 0.98 (0.94-1.02) | 0.998  | 1.11 (1.03-1.19) | 0.993  |
|              | 11:00 | 0.85 (0.82-0.88) | <0.001 | 0.79 (0.75-0.83) | <0.001 | 0.98 (0.91-1.06) | 0.993  |
|              | 12:00 | 1.1 (1.06-1.15)  | <0.001 | 1.02 (0.97-1.06) | 0.998  | 1.08 (1-1.16)    | 0.993  |

|                 |       |                  |        |                  |        |                  |        |
|-----------------|-------|------------------|--------|------------------|--------|------------------|--------|
|                 | 13:00 | 0.79 (0.75-0.82) | <0.001 | 0.76 (0.72-0.8)  | <0.001 | 0.92 (0.85-0.99) | 0.993  |
|                 | 14:00 | 0.86 (0.82-0.89) | <0.001 | 0.81 (0.77-0.85) | <0.001 | 0.98 (0.91-1.06) | 0.993  |
|                 | 15:00 | 0.89 (0.85-0.93) | <0.001 | 0.86 (0.82-0.9)  | <0.001 | 0.95 (0.88-1.02) | 0.993  |
|                 | 16:00 | 0.79 (0.76-0.83) | <0.001 | 0.78 (0.74-0.82) | <0.001 | 0.9 (0.83-0.97)  | 0.993  |
|                 | 17:00 | 0.78 (0.74-0.81) | <0.001 | 0.77 (0.73-0.81) | <0.001 | 0.92 (0.85-1)    | 0.993  |
|                 | 18:00 | 0.83 (0.79-0.86) | <0.001 | 0.82 (0.78-0.86) | <0.001 | 0.95 (0.88-1.03) | 0.993  |
|                 | 19:00 | 0.81 (0.78-0.85) | <0.001 | 0.81 (0.77-0.85) | <0.001 | 0.95 (0.87-1.03) | 0.993  |
|                 | 20:00 | 0.93 (0.89-0.96) | 0.066  | 0.92 (0.87-0.96) | 0.088  | 0.96 (0.89-1.04) | 0.993  |
|                 | 21:00 | 0.87 (0.83-0.9)  | <0.001 | 0.86 (0.82-0.9)  | <0.001 | 0.97 (0.89-1.05) | 0.993  |
|                 | 22:00 | 0.93 (0.9-0.97)  | 0.261  | 0.93 (0.88-0.97) | 0.351  | 0.99 (0.91-1.07) | 0.993  |
|                 | 23:00 | 0.91 (0.87-0.95) | 0.003  | 0.9 (0.86-0.95)  | 0.012  | 0.98 (0.91-1.07) | 0.993  |
| No Hypertension |       |                  | 1      |                  | 1      |                  | 1      |
|                 | 01:00 | 0.9 (0.86-0.94)  | <0.001 | 0.87 (0.83-0.91) | <0.001 | 1.04 (0.97-1.11) | 0.993  |
|                 | 02:00 | 0.94 (0.91-0.98) | 0.805  | 0.91 (0.87-0.96) | 0.049  | 1.06 (0.99-1.13) | 0.993  |
|                 | 03:00 | 0.93 (0.9-0.97)  | 0.161  | 0.9 (0.85-0.94)  | 0.004  | 1.04 (0.97-1.12) | 0.993  |
|                 | 04:00 | 0.91 (0.87-0.94) | <0.001 | 0.89 (0.85-0.94) | 0.003  | 1.03 (0.96-1.1)  | 0.993  |
|                 | 05:00 | 0.88 (0.84-0.92) | <0.001 | 0.87 (0.82-0.91) | <0.001 | 1.01 (0.94-1.08) | 0.993  |
|                 | 06:00 | 0.99 (0.95-1.03) | 1.000  | 0.93 (0.88-0.97) | 0.512  | 1.08 (1.01-1.15) | 0.993  |
|                 | 07:00 | 1.19 (1.15-1.23) | <0.001 | 1.1 (1.05-1.15)  | 0.010  | 1.17 (1.1-1.25)  | <0.001 |
|                 | 08:00 | 1.68 (1.63-1.74) | <0.001 | 1.49 (1.43-1.55) | <0.001 | 1.36 (1.28-1.44) | <0.001 |
|                 | 09:00 | 1.29 (1.25-1.34) | <0.001 | 1.13 (1.08-1.18) | <0.001 | 1.28 (1.21-1.36) | <0.001 |
|                 | 10:00 | 1.38 (1.33-1.43) | <0.001 | 1.19 (1.14-1.24) | <0.001 | 1.31 (1.24-1.39) | <0.001 |
|                 | 11:00 | 1.14 (1.1-1.19)  | <0.001 | 1 (0.96-1.05)    | 0.998  | 1.27 (1.2-1.35)  | <0.001 |
|                 | 12:00 | 1.35 (1.3-1.4)   | <0.001 | 1.22 (1.17-1.28) | <0.001 | 1.26 (1.19-1.34) | <0.001 |
|                 | 13:00 | 1.03 (1-1.07)    | 1.000  | 0.94 (0.9-0.99)  | 0.998  | 1.17 (1.1-1.25)  | 0.001  |
|                 | 14:00 | 1.06 (1.02-1.1)  | 0.515  | 0.97 (0.93-1.02) | 0.998  | 1.16 (1.09-1.23) | 0.004  |
|                 | 15:00 | 1.11 (1.07-1.15) | <0.001 | 1.02 (0.98-1.07) | 0.998  | 1.19 (1.12-1.27) | <0.001 |
|                 | 16:00 | 1.01 (0.98-1.05) | 1.000  | 0.96 (0.91-1)    | 0.998  | 1.15 (1.08-1.23) | 0.010  |
|                 | 17:00 | 0.92 (0.88-0.96) | 0.015  | 0.89 (0.84-0.93) | 0.001  | 1.06 (0.99-1.13) | 0.993  |
|                 | 18:00 | 0.95 (0.91-0.99) | 1.000  | 0.92 (0.87-0.96) | 0.193  | 1.08 (1.01-1.15) | 0.993  |
|                 | 19:00 | 0.9 (0.86-0.94)  | <0.001 | 0.87 (0.83-0.92) | <0.001 | 1.04 (0.97-1.11) | 0.993  |
|                 | 20:00 | 1.03 (0.99-1.07) | 1.000  | 1.01 (0.97-1.06) | 0.998  | 1.05 (0.98-1.12) | 0.993  |
|                 | 21:00 | 0.91 (0.88-0.95) | 0.002  | 0.89 (0.85-0.94) | 0.002  | 1.01 (0.94-1.08) | 0.993  |
|                 | 22:00 | 0.96 (0.92-1)    | 1.000  | 0.93 (0.89-0.98) | 0.969  | 1.03 (0.96-1.1)  | 0.993  |
|                 | 23:00 | 0.96 (0.92-1)    | 1.000  | 0.94 (0.89-0.98) | 0.998  | 1.04 (0.97-1.11) | 0.993  |
| CAD             |       |                  | 1      |                  | 1      |                  | 1      |
|                 | 01:00 | 0.91 (0.87-0.96) | 0.036  | 0.92 (0.88-0.97) | 0.345  | 1.06 (0.95-1.18) | 0.993  |
|                 | 02:00 | 0.93 (0.89-0.98) | 0.780  | 0.94 (0.89-0.98) | 0.998  | 1.1 (0.99-1.22)  | 0.993  |
|                 | 03:00 | 0.91 (0.87-0.95) | 0.027  | 0.91 (0.87-0.96) | 0.074  | 1.05 (0.94-1.17) | 0.993  |
|                 | 04:00 | 0.86 (0.82-0.9)  | <0.001 | 0.88 (0.84-0.92) | <0.001 | 1.02 (0.92-1.13) | 0.993  |
|                 | 05:00 | 0.81 (0.77-0.85) | <0.001 | 0.83 (0.79-0.88) | <0.001 | 1.01 (0.91-1.13) | 0.993  |
|                 | 06:00 | 0.91 (0.87-0.95) | 0.025  | 0.9 (0.86-0.94)  | 0.008  | 1.08 (0.98-1.2)  | 0.993  |
|                 | 07:00 | 1.01 (0.97-1.05) | 1.000  | 0.95 (0.91-1)    | 0.998  | 1.13 (1.03-1.25) | 0.993  |
|                 | 08:00 | 1.38 (1.33-1.44) | <0.001 | 1.25 (1.2-1.3)   | <0.001 | 1.2 (1.1-1.32)   | 0.059  |
|                 | 09:00 | 0.94 (0.9-0.98)  | 0.754  | 0.87 (0.83-0.91) | <0.001 | 1.08 (0.98-1.19) | 0.993  |
|                 | 10:00 | 0.97 (0.93-1.01) | 1.000  | 0.87 (0.83-0.91) | <0.001 | 1.11 (1.01-1.22) | 0.993  |
|                 | 11:00 | 0.74 (0.7-0.77)  | <0.001 | 0.71 (0.67-0.74) | <0.001 | 0.98 (0.89-1.09) | 0.993  |
|                 | 12:00 | 0.93 (0.89-0.97) | 0.335  | 0.87 (0.83-0.91) | <0.001 | 1 (0.9-1.1)      | 0.993  |
|                 | 13:00 | 0.68 (0.65-0.71) | <0.001 | 0.68 (0.65-0.72) | <0.001 | 0.86 (0.78-0.96) | 0.993  |

|               |       |                  |        |                  |        |                  |        |
|---------------|-------|------------------|--------|------------------|--------|------------------|--------|
|               | 14:00 | 0.73 (0.7-0.76)  | <0.001 | 0.71 (0.67-0.75) | <0.001 | 0.92 (0.83-1.02) | 0.993  |
|               | 15:00 | 0.77 (0.74-0.81) | <0.001 | 0.77 (0.73-0.81) | <0.001 | 0.85 (0.77-0.95) | 0.993  |
|               | 16:00 | 0.73 (0.7-0.77)  | <0.001 | 0.73 (0.69-0.77) | <0.001 | 0.96 (0.87-1.07) | 0.993  |
|               | 17:00 | 0.73 (0.7-0.77)  | <0.001 | 0.75 (0.71-0.79) | <0.001 | 0.94 (0.85-1.05) | 0.993  |
|               | 18:00 | 0.82 (0.78-0.86) | <0.001 | 0.83 (0.79-0.87) | <0.001 | 0.99 (0.89-1.1)  | 0.993  |
|               | 19:00 | 0.79 (0.75-0.82) | <0.001 | 0.79 (0.75-0.83) | <0.001 | 1.02 (0.92-1.14) | 0.993  |
|               | 20:00 | 0.94 (0.9-0.98)  | 1.000  | 0.93 (0.89-0.98) | 0.998  | 1.02 (0.92-1.13) | 0.993  |
|               | 21:00 | 0.91 (0.87-0.95) | 0.018  | 0.91 (0.87-0.96) | 0.068  | 1.08 (0.97-1.2)  | 0.993  |
|               | 22:00 | 0.96 (0.92-1)    | 1.000  | 0.95 (0.9-1)     | 0.998  | 1.09 (0.98-1.21) | 0.993  |
|               | 23:00 | 0.98 (0.94-1.02) | 1.000  | 0.98 (0.93-1.03) | 0.998  | 1.11 (1-1.24)    | 0.993  |
| No CAD        |       |                  | 1      |                  | 1      |                  | 1      |
|               | 01:00 | 0.87 (0.84-0.9)  | <0.001 | 0.85 (0.81-0.89) | <0.001 | 0.96 (0.9-1.02)  | 0.993  |
|               | 02:00 | 0.9 (0.87-0.94)  | <0.001 | 0.87 (0.84-0.92) | <0.001 | 0.99 (0.93-1.05) | 0.993  |
|               | 03:00 | 0.91 (0.88-0.94) | <0.001 | 0.87 (0.83-0.91) | <0.001 | 1.01 (0.95-1.07) | 0.993  |
|               | 04:00 | 0.86 (0.83-0.9)  | <0.001 | 0.83 (0.79-0.87) | <0.001 | 0.99 (0.93-1.05) | 0.993  |
|               | 05:00 | 0.84 (0.81-0.87) | <0.001 | 0.79 (0.75-0.83) | <0.001 | 0.98 (0.93-1.04) | 0.993  |
|               | 06:00 | 0.97 (0.94-1)    | 1.000  | 0.91 (0.86-0.95) | 0.008  | 1.03 (0.97-1.09) | 0.993  |
|               | 07:00 | 1.15 (1.11-1.19) | <0.001 | 1.07 (1.02-1.11) | 0.998  | 1.1 (1.04-1.16)  | 0.535  |
|               | 08:00 | 1.72 (1.67-1.77) | <0.001 | 1.57 (1.51-1.63) | <0.001 | 1.3 (1.24-1.37)  | <0.001 |
|               | 09:00 | 1.32 (1.28-1.37) | <0.001 | 1.19 (1.14-1.24) | <0.001 | 1.22 (1.16-1.28) | <0.001 |
|               | 10:00 | 1.42 (1.38-1.47) | <0.001 | 1.25 (1.2-1.31)  | <0.001 | 1.26 (1.2-1.33)  | <0.001 |
|               | 11:00 | 1.17 (1.13-1.21) | <0.001 | 1.05 (1-1.1)     | 0.998  | 1.2 (1.14-1.26)  | <0.001 |
|               | 12:00 | 1.42 (1.38-1.47) | <0.001 | 1.32 (1.27-1.38) | <0.001 | 1.24 (1.17-1.3)  | <0.001 |
|               | 13:00 | 1.07 (1.03-1.1)  | 0.123  | 0.99 (0.94-1.03) | 0.998  | 1.12 (1.06-1.19) | 0.019  |
|               | 14:00 | 1.11 (1.08-1.15) | <0.001 | 1.04 (1-1.09)    | 0.998  | 1.13 (1.07-1.19) | 0.013  |
|               | 15:00 | 1.15 (1.11-1.19) | <0.001 | 1.08 (1.03-1.13) | 0.234  | 1.15 (1.09-1.22) | <0.001 |
|               | 16:00 | 1.02 (0.98-1.05) | 1.000  | 0.99 (0.94-1.03) | 0.998  | 1.07 (1.01-1.13) | 0.993  |
|               | 17:00 | 0.92 (0.89-0.96) | 0.009  | 0.89 (0.85-0.94) | 0.001  | 1.02 (0.96-1.08) | 0.993  |
|               | 18:00 | 0.94 (0.9-0.97)  | 0.127  | 0.9 (0.86-0.94)  | 0.005  | 1.03 (0.97-1.09) | 0.993  |
|               | 19:00 | 0.9 (0.87-0.94)  | <0.001 | 0.89 (0.85-0.93) | <0.001 | 0.99 (0.94-1.05) | 0.993  |
|               | 20:00 | 1 (0.97-1.04)    | 1.000  | 0.99 (0.94-1.03) | 0.998  | 1.01 (0.96-1.07) | 0.993  |
|               | 21:00 | 0.88 (0.84-0.91) | <0.001 | 0.85 (0.81-0.89) | <0.001 | 0.96 (0.91-1.02) | 0.993  |
|               | 22:00 | 0.94 (0.9-0.97)  | 0.138  | 0.91 (0.87-0.95) | 0.022  | 0.98 (0.93-1.04) | 0.993  |
|               | 23:00 | 0.9 (0.87-0.94)  | <0.001 | 0.87 (0.83-0.91) | <0.001 | 0.98 (0.93-1.04) | 0.993  |
| Beta-blockers |       |                  | 1      |                  | 1      |                  | 1      |
|               | 01:00 | 0.89 (0.85-0.92) | <0.001 | 0.89 (0.85-0.93) | 0.001  | 1 (0.91-1.09)    | 0.993  |
|               | 02:00 | 0.9 (0.86-0.93)  | <0.001 | 0.9 (0.86-0.95)  | 0.005  | 0.99 (0.91-1.08) | 0.993  |
|               | 03:00 | 0.89 (0.85-0.93) | <0.001 | 0.88 (0.84-0.92) | <0.001 | 1.01 (0.93-1.11) | 0.993  |
|               | 04:00 | 0.83 (0.8-0.87)  | <0.001 | 0.85 (0.81-0.89) | <0.001 | 1 (0.91-1.09)    | 0.993  |
|               | 05:00 | 0.79 (0.76-0.83) | <0.001 | 0.8 (0.76-0.84)  | <0.001 | 1 (0.92-1.09)    | 0.993  |
|               | 06:00 | 0.88 (0.84-0.91) | <0.001 | 0.86 (0.82-0.9)  | <0.001 | 1.01 (0.93-1.1)  | 0.993  |
|               | 07:00 | 0.97 (0.93-1.01) | 1.000  | 0.92 (0.88-0.96) | 0.060  | 1.02 (0.94-1.11) | 0.993  |
|               | 08:00 | 1.38 (1.33-1.43) | <0.001 | 1.26 (1.21-1.31) | <0.001 | 1.13 (1.05-1.22) | 0.993  |
|               | 09:00 | 0.92 (0.88-0.96) | 0.009  | 0.85 (0.81-0.88) | <0.001 | 0.99 (0.92-1.08) | 0.993  |
|               | 10:00 | 0.95 (0.91-0.98) | 1.000  | 0.85 (0.81-0.88) | <0.001 | 1.02 (0.95-1.11) | 0.993  |
|               | 11:00 | 0.72 (0.69-0.75) | <0.001 | 0.68 (0.65-0.72) | <0.001 | 0.88 (0.81-0.96) | 0.993  |
|               | 12:00 | 0.95 (0.91-0.99) | 1.000  | 0.89 (0.85-0.93) | <0.001 | 0.95 (0.88-1.03) | 0.993  |
|               | 13:00 | 0.68 (0.65-0.71) | <0.001 | 0.66 (0.63-0.7)  | <0.001 | 0.86 (0.79-0.94) | 0.376  |
|               | 14:00 | 0.74 (0.71-0.77) | <0.001 | 0.72 (0.69-0.76) | <0.001 | 0.86 (0.79-0.94) | 0.625  |

|                  |       |                  |        |                  |        |                  |        |
|------------------|-------|------------------|--------|------------------|--------|------------------|--------|
|                  | 15:00 | 0.79 (0.76-0.82) | <0.001 | 0.77 (0.73-0.8)  | <0.001 | 0.88 (0.81-0.96) | 0.993  |
|                  | 16:00 | 0.73 (0.7-0.76)  | <0.001 | 0.72 (0.68-0.75) | <0.001 | 0.92 (0.84-1)    | 0.993  |
|                  | 17:00 | 0.74 (0.71-0.77) | <0.001 | 0.74 (0.7-0.77)  | <0.001 | 0.94 (0.86-1.02) | 0.993  |
|                  | 18:00 | 0.8 (0.76-0.83)  | <0.001 | 0.8 (0.76-0.84)  | <0.001 | 0.95 (0.87-1.03) | 0.993  |
|                  | 19:00 | 0.77 (0.74-0.8)  | <0.001 | 0.76 (0.73-0.8)  | <0.001 | 0.98 (0.9-1.07)  | 0.993  |
|                  | 20:00 | 0.92 (0.88-0.95) | 0.009  | 0.92 (0.88-0.96) | 0.044  | 0.96 (0.88-1.04) | 0.993  |
|                  | 21:00 | 0.87 (0.84-0.91) | <0.001 | 0.88 (0.84-0.92) | <0.001 | 0.97 (0.89-1.06) | 0.993  |
|                  | 22:00 | 0.94 (0.9-0.98)  | 0.780  | 0.93 (0.89-0.97) | 0.681  | 1.02 (0.94-1.11) | 0.993  |
|                  | 23:00 | 0.96 (0.92-1)    | 1.000  | 0.96 (0.92-1.01) | 0.998  | 1.05 (0.96-1.14) | 0.993  |
| No Beta-blockers |       |                  | 1      |                  | 1      |                  | 1      |
|                  | 01:00 | 0.89 (0.85-0.92) | <0.001 | 0.87 (0.83-0.91) | <0.001 | 0.98 (0.91-1.04) | 0.993  |
|                  | 02:00 | 0.93 (0.9-0.97)  | 0.169  | 0.9 (0.86-0.95)  | 0.014  | 1.02 (0.96-1.09) | 0.993  |
|                  | 03:00 | 0.93 (0.89-0.97) | 0.101  | 0.89 (0.85-0.94) | 0.004  | 1.02 (0.95-1.08) | 0.993  |
|                  | 04:00 | 0.88 (0.85-0.92) | <0.001 | 0.86 (0.82-0.91) | <0.001 | 0.99 (0.93-1.06) | 0.993  |
|                  | 05:00 | 0.86 (0.83-0.9)  | <0.001 | 0.83 (0.78-0.87) | <0.001 | 0.98 (0.92-1.05) | 0.993  |
|                  | 06:00 | 1.01 (0.97-1.05) | 1.000  | 0.96 (0.91-1)    | 0.998  | 1.05 (0.99-1.12) | 0.993  |
|                  | 07:00 | 1.21 (1.17-1.26) | <0.001 | 1.13 (1.08-1.18) | <0.001 | 1.15 (1.09-1.22) | 0.002  |
|                  | 08:00 | 1.78 (1.72-1.83) | <0.001 | 1.61 (1.55-1.68) | <0.001 | 1.35 (1.28-1.43) | <0.001 |
|                  | 09:00 | 1.41 (1.36-1.46) | <0.001 | 1.27 (1.21-1.33) | <0.001 | 1.28 (1.21-1.36) | <0.001 |
|                  | 10:00 | 1.51 (1.46-1.57) | <0.001 | 1.35 (1.29-1.41) | <0.001 | 1.33 (1.26-1.41) | <0.001 |
|                  | 11:00 | 1.26 (1.21-1.3)  | <0.001 | 1.13 (1.08-1.19) | <0.001 | 1.29 (1.22-1.36) | <0.001 |
|                  | 12:00 | 1.49 (1.44-1.54) | <0.001 | 1.38 (1.32-1.44) | <0.001 | 1.3 (1.23-1.37)  | <0.001 |
|                  | 13:00 | 1.13 (1.09-1.17) | <0.001 | 1.06 (1.01-1.11) | 0.998  | 1.17 (1.1-1.24)  | <0.001 |
|                  | 14:00 | 1.17 (1.12-1.21) | <0.001 | 1.08 (1.03-1.13) | 0.408  | 1.19 (1.12-1.26) | <0.001 |
|                  | 15:00 | 1.2 (1.16-1.24)  | <0.001 | 1.14 (1.08-1.19) | <0.001 | 1.19 (1.12-1.26) | <0.001 |
|                  | 16:00 | 1.07 (1.03-1.11) | 0.287  | 1.04 (0.99-1.09) | 0.998  | 1.11 (1.05-1.18) | 0.351  |
|                  | 17:00 | 0.95 (0.92-0.99) | 1.000  | 0.93 (0.89-0.98) | 0.998  | 1.03 (0.97-1.1)  | 0.993  |
|                  | 18:00 | 0.98 (0.94-1.01) | 1.000  | 0.95 (0.9-1)     | 0.998  | 1.06 (1-1.13)    | 0.993  |
|                  | 19:00 | 0.94 (0.9-0.98)  | 0.562  | 0.94 (0.89-0.98) | 0.998  | 1.01 (0.95-1.08) | 0.993  |
|                  | 20:00 | 1.03 (0.99-1.07) | 1.000  | 1.01 (0.97-1.06) | 0.998  | 1.04 (0.98-1.11) | 0.993  |
|                  | 21:00 | 0.91 (0.87-0.94) | <0.001 | 0.88 (0.83-0.92) | <0.001 | 1 (0.94-1.07)    | 0.993  |
|                  | 22:00 | 0.95 (0.92-0.99) | 1.000  | 0.92 (0.88-0.97) | 0.470  | 1 (0.94-1.07)    | 0.993  |
|                  | 23:00 | 0.91 (0.87-0.94) | 0.001  | 0.87 (0.83-0.91) | <0.001 | 0.99 (0.93-1.06) | 0.993  |
| Ca-inhibitor     |       |                  | 1      |                  | 1      |                  | 1      |
|                  | 01:00 | 0.92 (0.86-0.98) | 1.000  | 0.96 (0.9-1.04)  | 0.998  | 0.88 (0.77-1)    | 0.993  |
|                  | 02:00 | 0.92 (0.87-0.98) | 1.000  | 0.93 (0.87-1)    | 0.998  | 0.99 (0.87-1.12) | 0.993  |
|                  | 03:00 | 0.92 (0.86-0.98) | 1.000  | 0.94 (0.87-1.01) | 0.998  | 0.93 (0.81-1.06) | 0.993  |
|                  | 04:00 | 0.85 (0.79-0.9)  | <0.001 | 0.87 (0.81-0.94) | 0.116  | 0.93 (0.82-1.06) | 0.993  |
|                  | 05:00 | 0.82 (0.77-0.87) | <0.001 | 0.82 (0.76-0.89) | <0.001 | 0.99 (0.87-1.13) | 0.993  |
|                  | 06:00 | 0.92 (0.86-0.98) | 1.000  | 0.91 (0.85-0.98) | 0.998  | 0.98 (0.86-1.11) | 0.993  |
|                  | 07:00 | 1 (0.94-1.06)    | 1.000  | 0.97 (0.9-1.03)  | 0.998  | 0.97 (0.86-1.1)  | 0.993  |
|                  | 08:00 | 1.43 (1.36-1.51) | <0.001 | 1.3 (1.22-1.39)  | <0.001 | 1.15 (1.03-1.29) | 0.993  |
|                  | 09:00 | 1.03 (0.97-1.09) | 1.000  | 0.94 (0.87-1.01) | 0.998  | 1.08 (0.96-1.21) | 0.993  |
|                  | 10:00 | 1.05 (0.99-1.11) | 1.000  | 0.92 (0.86-0.99) | 0.998  | 1.11 (0.99-1.25) | 0.993  |
|                  | 11:00 | 0.82 (0.77-0.87) | <0.001 | 0.75 (0.69-0.81) | <0.001 | 1.03 (0.91-1.16) | 0.993  |
|                  | 12:00 | 1.02 (0.96-1.08) | 1.000  | 0.93 (0.86-0.99) | 0.998  | 1.06 (0.94-1.19) | 0.993  |
|                  | 13:00 | 0.76 (0.71-0.81) | <0.001 | 0.74 (0.68-0.8)  | <0.001 | 0.91 (0.8-1.03)  | 0.993  |
|                  | 14:00 | 0.79 (0.74-0.84) | <0.001 | 0.74 (0.69-0.8)  | <0.001 | 0.93 (0.82-1.05) | 0.993  |
|                  | 15:00 | 0.81 (0.76-0.86) | <0.001 | 0.79 (0.74-0.85) | <0.001 | 0.85 (0.75-0.97) | 0.993  |

|                 |       |                  |        |                  |        |                  |        |
|-----------------|-------|------------------|--------|------------------|--------|------------------|--------|
|                 | 16:00 | 0.73 (0.69-0.78) | <0.001 | 0.73 (0.67-0.79) | <0.001 | 0.86 (0.75-0.97) | 0.993  |
|                 | 17:00 | 0.72 (0.68-0.78) | <0.001 | 0.74 (0.68-0.8)  | <0.001 | 0.84 (0.73-0.96) | 0.993  |
|                 | 18:00 | 0.79 (0.74-0.85) | <0.001 | 0.82 (0.76-0.88) | <0.001 | 0.84 (0.74-0.96) | 0.993  |
|                 | 19:00 | 0.79 (0.74-0.84) | <0.001 | 0.8 (0.74-0.87)  | <0.001 | 0.91 (0.79-1.03) | 0.993  |
|                 | 20:00 | 0.93 (0.87-0.98) | 1.000  | 0.93 (0.86-1)    | 0.998  | 0.94 (0.83-1.07) | 0.993  |
|                 | 21:00 | 0.88 (0.82-0.93) | 0.017  | 0.9 (0.83-0.96)  | 0.915  | 0.91 (0.79-1.03) | 0.993  |
|                 | 22:00 | 0.95 (0.89-1.01) | 1.000  | 0.96 (0.89-1.03) | 0.998  | 0.94 (0.83-1.07) | 0.993  |
|                 | 23:00 | 0.95 (0.89-1.01) | 1.000  | 0.96 (0.89-1.03) | 0.998  | 0.98 (0.87-1.12) | 0.993  |
| No Ca-inhibitor |       |                  | 1      |                  | 1      |                  | 1      |
|                 | 01:00 | 0.88 (0.85-0.91) | <0.001 | 0.86 (0.83-0.89) | <0.001 | 1 (0.95-1.06)    | 0.993  |
|                 | 02:00 | 0.91 (0.89-0.94) | <0.001 | 0.89 (0.86-0.93) | <0.001 | 1.02 (0.96-1.08) | 0.993  |
|                 | 03:00 | 0.91 (0.88-0.94) | <0.001 | 0.87 (0.84-0.91) | <0.001 | 1.03 (0.98-1.09) | 0.993  |
|                 | 04:00 | 0.86 (0.84-0.89) | <0.001 | 0.85 (0.82-0.88) | <0.001 | 1.01 (0.95-1.06) | 0.993  |
|                 | 05:00 | 0.83 (0.8-0.86)  | <0.001 | 0.81 (0.78-0.84) | <0.001 | 0.99 (0.93-1.05) | 0.993  |
|                 | 06:00 | 0.95 (0.92-0.98) | 0.770  | 0.9 (0.87-0.93)  | <0.001 | 1.05 (1-1.11)    | 0.993  |
|                 | 07:00 | 1.12 (1.09-1.15) | <0.001 | 1.03 (0.99-1.06) | 0.998  | 1.13 (1.07-1.19) | 0.002  |
|                 | 08:00 | 1.62 (1.58-1.67) | <0.001 | 1.45 (1.41-1.5)  | <0.001 | 1.3 (1.24-1.37)  | <0.001 |
|                 | 09:00 | 1.21 (1.17-1.24) | <0.001 | 1.07 (1.03-1.11) | 0.083  | 1.2 (1.15-1.27)  | <0.001 |
|                 | 10:00 | 1.29 (1.25-1.32) | <0.001 | 1.12 (1.08-1.16) | <0.001 | 1.25 (1.19-1.31) | <0.001 |
|                 | 11:00 | 1.04 (1.01-1.07) | 1.000  | 0.93 (0.9-0.97)  | 0.063  | 1.17 (1.11-1.23) | <0.001 |
|                 | 12:00 | 1.28 (1.24-1.31) | <0.001 | 1.17 (1.13-1.21) | <0.001 | 1.2 (1.14-1.26)  | <0.001 |
|                 | 13:00 | 0.95 (0.92-0.98) | 0.478  | 0.88 (0.84-0.91) | <0.001 | 1.09 (1.04-1.15) | 0.684  |
|                 | 14:00 | 1 (0.97-1.03)    | 1.000  | 0.93 (0.89-0.96) | 0.037  | 1.11 (1.05-1.17) | 0.088  |
|                 | 15:00 | 1.05 (1.02-1.08) | 0.960  | 0.98 (0.94-1.01) | 0.998  | 1.13 (1.07-1.19) | 0.005  |
|                 | 16:00 | 0.95 (0.92-0.98) | 0.231  | 0.9 (0.87-0.94)  | <0.001 | 1.08 (1.03-1.14) | 0.993  |
|                 | 17:00 | 0.88 (0.85-0.91) | <0.001 | 0.85 (0.82-0.88) | <0.001 | 1.03 (0.98-1.09) | 0.993  |
|                 | 18:00 | 0.91 (0.89-0.94) | <0.001 | 0.88 (0.85-0.92) | <0.001 | 1.05 (1-1.11)    | 0.993  |
|                 | 19:00 | 0.87 (0.85-0.9)  | <0.001 | 0.85 (0.82-0.89) | <0.001 | 1.02 (0.96-1.08) | 0.993  |
|                 | 20:00 | 0.99 (0.96-1.02) | 1.000  | 0.97 (0.93-1.01) | 0.998  | 1.03 (0.97-1.09) | 0.993  |
|                 | 21:00 | 0.89 (0.87-0.92) | <0.001 | 0.87 (0.84-0.91) | <0.001 | 1.01 (0.95-1.06) | 0.993  |
|                 | 22:00 | 0.95 (0.92-0.98) | 0.174  | 0.92 (0.89-0.96) | 0.005  | 1.02 (0.97-1.08) | 0.993  |
|                 | 23:00 | 0.93 (0.9-0.96)  | 0.003  | 0.91 (0.87-0.94) | <0.001 | 1.02 (0.96-1.08) | 0.993  |
| Aspirin         |       |                  | 1      |                  | 1      |                  | 1      |
|                 | 01:00 | 0.87 (0.84-0.91) | <0.001 | 0.88 (0.84-0.92) | <0.001 | 0.97 (0.88-1.06) | 0.993  |
|                 | 02:00 | 0.89 (0.86-0.93) | <0.001 | 0.9 (0.86-0.94)  | 0.001  | 1 (0.91-1.09)    | 0.993  |
|                 | 03:00 | 0.88 (0.85-0.92) | <0.001 | 0.88 (0.84-0.92) | <0.001 | 0.99 (0.91-1.09) | 0.993  |
|                 | 04:00 | 0.81 (0.78-0.84) | <0.001 | 0.82 (0.79-0.86) | <0.001 | 0.96 (0.88-1.05) | 0.993  |
|                 | 05:00 | 0.77 (0.74-0.8)  | <0.001 | 0.78 (0.75-0.82) | <0.001 | 0.96 (0.87-1.05) | 0.993  |
|                 | 06:00 | 0.88 (0.85-0.92) | <0.001 | 0.87 (0.83-0.91) | <0.001 | 1.02 (0.93-1.11) | 0.993  |
|                 | 07:00 | 1.01 (0.97-1.05) | 1.000  | 0.95 (0.91-0.99) | 0.998  | 1.09 (1.01-1.19) | 0.993  |
|                 | 08:00 | 1.42 (1.37-1.47) | <0.001 | 1.28 (1.23-1.33) | <0.001 | 1.22 (1.13-1.31) | <0.001 |
|                 | 09:00 | 0.96 (0.92-0.99) | 1.000  | 0.89 (0.85-0.93) | <0.001 | 1.03 (0.95-1.11) | 0.993  |
|                 | 10:00 | 0.98 (0.95-1.02) | 1.000  | 0.89 (0.85-0.93) | <0.001 | 1.05 (0.97-1.14) | 0.993  |
|                 | 11:00 | 0.75 (0.72-0.78) | <0.001 | 0.71 (0.68-0.75) | <0.001 | 0.93 (0.85-1.01) | 0.993  |
|                 | 12:00 | 0.97 (0.93-1.01) | 1.000  | 0.91 (0.87-0.95) | 0.004  | 0.98 (0.9-1.07)  | 0.993  |
|                 | 13:00 | 0.69 (0.67-0.73) | <0.001 | 0.69 (0.66-0.73) | <0.001 | 0.83 (0.76-0.91) | 0.038  |
|                 | 14:00 | 0.75 (0.72-0.78) | <0.001 | 0.74 (0.7-0.77)  | <0.001 | 0.87 (0.8-0.95)  | 0.993  |
|                 | 15:00 | 0.78 (0.75-0.81) | <0.001 | 0.77 (0.74-0.81) | <0.001 | 0.83 (0.76-0.91) | 0.037  |
|                 | 16:00 | 0.73 (0.7-0.76)  | <0.001 | 0.73 (0.7-0.77)  | <0.001 | 0.87 (0.79-0.95) | 0.993  |



|            |       |                  |        |                  |        |                  |        |
|------------|-------|------------------|--------|------------------|--------|------------------|--------|
|            | 17:00 | 0.71 (0.68-0.74) | <0.001 | 0.72 (0.68-0.76) | <0.001 | 0.89 (0.81-0.97) | 0.993  |
|            | 18:00 | 0.8 (0.76-0.83)  | <0.001 | 0.81 (0.77-0.85) | <0.001 | 0.91 (0.83-1)    | 0.993  |
|            | 19:00 | 0.76 (0.73-0.8)  | <0.001 | 0.76 (0.73-0.8)  | <0.001 | 0.95 (0.87-1.04) | 0.993  |
|            | 20:00 | 0.92 (0.88-0.96) | 0.014  | 0.92 (0.88-0.96) | 0.049  | 0.97 (0.89-1.06) | 0.993  |
|            | 21:00 | 0.86 (0.83-0.9)  | <0.001 | 0.87 (0.83-0.91) | <0.001 | 0.96 (0.88-1.05) | 0.993  |
|            | 22:00 | 0.93 (0.89-0.97) | 0.095  | 0.92 (0.88-0.96) | 0.108  | 1.01 (0.93-1.1)  | 0.993  |
|            | 23:00 | 0.94 (0.9-0.97)  | 0.363  | 0.94 (0.9-0.98)  | 0.998  | 1 (0.92-1.1)     | 0.993  |
| No Aspirin |       |                  | 1      |                  | 1      |                  | 1      |
|            | 01:00 | 0.9 (0.86-0.94)  | <0.001 | 0.88 (0.83-0.92) | <0.001 | 0.99 (0.93-1.06) | 0.993  |
|            | 02:00 | 0.94 (0.9-0.98)  | 0.480  | 0.91 (0.87-0.96) | 0.067  | 1.02 (0.96-1.09) | 0.993  |
|            | 03:00 | 0.94 (0.9-0.97)  | 0.416  | 0.9 (0.85-0.94)  | 0.010  | 1.03 (0.96-1.09) | 0.993  |
|            | 04:00 | 0.91 (0.87-0.95) | 0.001  | 0.89 (0.85-0.94) | 0.004  | 1.01 (0.95-1.08) | 0.993  |
|            | 05:00 | 0.88 (0.85-0.92) | <0.001 | 0.84 (0.8-0.89)  | <0.001 | 1.01 (0.95-1.07) | 0.993  |
|            | 06:00 | 1.01 (0.97-1.05) | 1.000  | 0.95 (0.9-0.99)  | 0.998  | 1.05 (0.99-1.12) | 0.993  |
|            | 07:00 | 1.18 (1.14-1.22) | <0.001 | 1.1 (1.05-1.15)  | 0.040  | 1.11 (1.05-1.18) | 0.234  |
|            | 08:00 | 1.74 (1.69-1.8)  | <0.001 | 1.59 (1.53-1.66) | <0.001 | 1.31 (1.24-1.38) | <0.001 |
|            | 09:00 | 1.37 (1.33-1.42) | <0.001 | 1.23 (1.17-1.28) | <0.001 | 1.26 (1.2-1.33)  | <0.001 |
|            | 10:00 | 1.49 (1.44-1.54) | <0.001 | 1.31 (1.25-1.37) | <0.001 | 1.32 (1.25-1.39) | <0.001 |
|            | 11:00 | 1.24 (1.19-1.28) | <0.001 | 1.11 (1.06-1.16) | 0.010  | 1.26 (1.19-1.33) | <0.001 |
|            | 12:00 | 1.47 (1.42-1.53) | <0.001 | 1.37 (1.31-1.43) | <0.001 | 1.28 (1.21-1.35) | <0.001 |
|            | 13:00 | 1.12 (1.08-1.17) | <0.001 | 1.03 (0.98-1.09) | 0.998  | 1.18 (1.11-1.25) | <0.001 |
|            | 14:00 | 1.16 (1.12-1.21) | <0.001 | 1.07 (1.02-1.13) | 0.998  | 1.18 (1.12-1.25) | <0.001 |
|            | 15:00 | 1.21 (1.17-1.26) | <0.001 | 1.14 (1.09-1.2)  | <0.001 | 1.21 (1.14-1.28) | <0.001 |
|            | 16:00 | 1.07 (1.03-1.11) | 0.141  | 1.03 (0.98-1.08) | 0.998  | 1.14 (1.07-1.21) | 0.020  |
|            | 17:00 | 0.98 (0.94-1.02) | 1.000  | 0.96 (0.91-1.01) | 0.998  | 1.06 (0.99-1.12) | 0.993  |
|            | 18:00 | 0.98 (0.94-1.02) | 1.000  | 0.94 (0.89-0.99) | 0.998  | 1.07 (1.01-1.14) | 0.993  |
|            | 19:00 | 0.95 (0.91-0.99) | 1.000  | 0.94 (0.89-0.98) | 0.998  | 1.03 (0.96-1.09) | 0.993  |
|            | 20:00 | 1.03 (0.99-1.07) | 1.000  | 1.01 (0.97-1.06) | 0.998  | 1.04 (0.98-1.1)  | 0.993  |
|            | 21:00 | 0.92 (0.88-0.95) | 0.006  | 0.89 (0.85-0.94) | 0.002  | 1 (0.94-1.07)    | 0.993  |
|            | 22:00 | 0.96 (0.93-1)    | 1.000  | 0.94 (0.89-0.98) | 0.998  | 1.01 (0.95-1.07) | 0.993  |
|            | 23:00 | 0.93 (0.9-0.97)  | 0.156  | 0.89 (0.85-0.93) | 0.002  | 1.02 (0.96-1.08) | 0.993  |
| ACE-I/ARB  |       |                  | 1      |                  | 1      |                  | 1      |
|            | 01:00 | 0.87 (0.83-0.91) | <0.001 | 0.9 (0.85-0.95)  | 0.026  | 0.9 (0.81-1.01)  | 0.993  |
|            | 02:00 | 0.87 (0.83-0.92) | <0.001 | 0.89 (0.84-0.94) | 0.009  | 0.93 (0.84-1.03) | 0.993  |
|            | 03:00 | 0.87 (0.83-0.91) | <0.001 | 0.89 (0.84-0.94) | 0.011  | 0.89 (0.8-0.99)  | 0.993  |
|            | 04:00 | 0.81 (0.77-0.85) | <0.001 | 0.84 (0.79-0.88) | <0.001 | 0.92 (0.83-1.02) | 0.993  |
|            | 05:00 | 0.78 (0.75-0.82) | <0.001 | 0.82 (0.77-0.86) | <0.001 | 0.9 (0.81-1)     | 0.993  |
|            | 06:00 | 0.84 (0.8-0.88)  | <0.001 | 0.83 (0.79-0.88) | <0.001 | 0.91 (0.83-1.01) | 0.993  |
|            | 07:00 | 1.03 (0.98-1.08) | 1.000  | 0.99 (0.94-1.05) | 0.998  | 1.02 (0.93-1.13) | 0.993  |
|            | 08:00 | 1.48 (1.42-1.55) | <0.001 | 1.37 (1.31-1.43) | <0.001 | 1.16 (1.06-1.27) | 0.839  |
|            | 09:00 | 1.01 (0.96-1.05) | 1.000  | 0.94 (0.89-0.98) | 0.998  | 1.07 (0.97-1.17) | 0.993  |
|            | 10:00 | 1.03 (0.98-1.08) | 1.000  | 0.94 (0.89-0.99) | 0.998  | 1.06 (0.97-1.16) | 0.993  |
|            | 11:00 | 0.79 (0.75-0.83) | <0.001 | 0.75 (0.71-0.8)  | <0.001 | 0.97 (0.88-1.07) | 0.993  |
|            | 12:00 | 1.04 (0.99-1.08) | 1.000  | 0.97 (0.92-1.02) | 0.998  | 1.03 (0.94-1.13) | 0.993  |
|            | 13:00 | 0.74 (0.7-0.78)  | <0.001 | 0.73 (0.69-0.77) | <0.001 | 0.9 (0.81-0.99)  | 0.993  |
|            | 14:00 | 0.78 (0.74-0.82) | <0.001 | 0.76 (0.72-0.81) | <0.001 | 0.92 (0.83-1.01) | 0.993  |
|            | 15:00 | 0.82 (0.78-0.86) | <0.001 | 0.81 (0.76-0.85) | <0.001 | 0.9 (0.81-0.99)  | 0.993  |
|            | 16:00 | 0.74 (0.7-0.78)  | <0.001 | 0.75 (0.7-0.79)  | <0.001 | 0.85 (0.77-0.94) | 0.993  |
|            | 17:00 | 0.72 (0.68-0.76) | <0.001 | 0.73 (0.69-0.77) | <0.001 | 0.9 (0.81-0.99)  | 0.993  |

|              |       |                  |        |                  |        |                  |        |
|--------------|-------|------------------|--------|------------------|--------|------------------|--------|
|              | 18:00 | 0.78 (0.74-0.82) | <0.001 | 0.8 (0.75-0.84)  | <0.001 | 0.87 (0.78-0.97) | 0.993  |
|              | 19:00 | 0.77 (0.74-0.81) | <0.001 | 0.79 (0.74-0.83) | <0.001 | 0.91 (0.82-1.01) | 0.993  |
|              | 20:00 | 0.93 (0.88-0.97) | 0.484  | 0.93 (0.89-0.98) | 0.998  | 0.94 (0.84-1.04) | 0.993  |
|              | 21:00 | 0.83 (0.79-0.87) | <0.001 | 0.83 (0.78-0.87) | <0.001 | 0.94 (0.85-1.05) | 0.993  |
|              | 22:00 | 0.91 (0.86-0.95) | 0.016  | 0.93 (0.88-0.98) | 0.998  | 0.87 (0.78-0.97) | 0.993  |
|              | 23:00 | 0.92 (0.88-0.96) | 0.141  | 0.94 (0.89-0.99) | 0.998  | 0.93 (0.84-1.04) | 0.993  |
| No ACE-I/ARB |       |                  | 1      |                  | 1      |                  | 1      |
|              | 01:00 | 0.89 (0.86-0.93) | <0.001 | 0.87 (0.83-0.91) | <0.001 | 1.01 (0.95-1.07) | 0.993  |
|              | 02:00 | 0.94 (0.91-0.97) | 0.111  | 0.91 (0.87-0.95) | 0.007  | 1.04 (0.98-1.1)  | 0.993  |
|              | 03:00 | 0.93 (0.9-0.96)  | 0.021  | 0.88 (0.85-0.92) | <0.001 | 1.06 (1-1.12)    | 0.993  |
|              | 04:00 | 0.89 (0.86-0.92) | <0.001 | 0.87 (0.83-0.9)  | <0.001 | 1.02 (0.96-1.08) | 0.993  |
|              | 05:00 | 0.85 (0.82-0.88) | <0.001 | 0.81 (0.77-0.85) | <0.001 | 1.02 (0.96-1.08) | 0.993  |
|              | 06:00 | 1 (0.97-1.04)    | 1.000  | 0.95 (0.91-0.99) | 0.998  | 1.08 (1.02-1.14) | 0.993  |
|              | 07:00 | 1.13 (1.09-1.17) | <0.001 | 1.03 (0.99-1.07) | 0.998  | 1.13 (1.07-1.2)  | 0.005  |
|              | 08:00 | 1.64 (1.59-1.69) | <0.001 | 1.45 (1.4-1.51)  | <0.001 | 1.32 (1.25-1.38) | <0.001 |
|              | 09:00 | 1.26 (1.22-1.3)  | <0.001 | 1.11 (1.07-1.15) | <0.001 | 1.22 (1.16-1.29) | <0.001 |
|              | 10:00 | 1.35 (1.31-1.4)  | <0.001 | 1.17 (1.12-1.21) | <0.001 | 1.28 (1.22-1.35) | <0.001 |
|              | 11:00 | 1.11 (1.07-1.15) | <0.001 | 0.98 (0.94-1.02) | 0.998  | 1.21 (1.14-1.27) | <0.001 |
|              | 12:00 | 1.33 (1.29-1.37) | <0.001 | 1.21 (1.16-1.25) | <0.001 | 1.23 (1.17-1.3)  | <0.001 |
|              | 13:00 | 1.01 (0.97-1.04) | 1.000  | 0.92 (0.88-0.96) | 0.102  | 1.12 (1.06-1.18) | 0.050  |
|              | 14:00 | 1.06 (1.02-1.09) | 0.342  | 0.97 (0.93-1.01) | 0.998  | 1.13 (1.07-1.2)  | 0.006  |
|              | 15:00 | 1.1 (1.06-1.13)  | <0.001 | 1.02 (0.98-1.06) | 0.998  | 1.14 (1.08-1.21) | 0.001  |
|              | 16:00 | 1 (0.96-1.03)    | 1.000  | 0.94 (0.9-0.99)  | 0.998  | 1.11 (1.05-1.18) | 0.179  |
|              | 17:00 | 0.92 (0.89-0.95) | 0.001  | 0.89 (0.85-0.93) | <0.001 | 1.04 (0.98-1.1)  | 0.993  |
|              | 18:00 | 0.95 (0.92-0.98) | 0.989  | 0.92 (0.88-0.96) | 0.025  | 1.07 (1.01-1.13) | 0.993  |
|              | 19:00 | 0.9 (0.87-0.94)  | <0.001 | 0.88 (0.84-0.92) | <0.001 | 1.03 (0.97-1.09) | 0.993  |
|              | 20:00 | 1 (0.97-1.04)    | 1.000  | 0.98 (0.94-1.02) | 0.998  | 1.04 (0.98-1.1)  | 0.993  |
|              | 21:00 | 0.92 (0.89-0.96) | 0.003  | 0.91 (0.87-0.95) | 0.005  | 1.01 (0.95-1.07) | 0.993  |
|              | 22:00 | 0.97 (0.94-1)    | 1.000  | 0.93 (0.89-0.97) | 0.211  | 1.05 (0.99-1.12) | 0.993  |
|              | 23:00 | 0.94 (0.91-0.98) | 0.276  | 0.91 (0.87-0.95) | 0.003  | 1.04 (0.98-1.1)  | 0.993  |
| Statins      |       |                  | 1      |                  | 1      |                  | 1      |
|              | 01:00 | 0.85 (0.81-0.9)  | <0.001 | 0.86 (0.81-0.91) | <0.001 | 0.95 (0.84-1.06) | 0.993  |
|              | 02:00 | 0.86 (0.82-0.91) | <0.001 | 0.88 (0.84-0.94) | 0.010  | 0.91 (0.81-1.02) | 0.993  |
|              | 03:00 | 0.84 (0.79-0.88) | <0.001 | 0.84 (0.79-0.89) | <0.001 | 0.94 (0.84-1.06) | 0.993  |
|              | 04:00 | 0.8 (0.75-0.84)  | <0.001 | 0.81 (0.76-0.86) | <0.001 | 0.95 (0.84-1.07) | 0.993  |
|              | 05:00 | 0.74 (0.7-0.78)  | <0.001 | 0.76 (0.72-0.81) | <0.001 | 0.88 (0.78-0.99) | 0.993  |
|              | 06:00 | 0.84 (0.8-0.89)  | <0.001 | 0.84 (0.79-0.89) | <0.001 | 0.93 (0.83-1.05) | 0.993  |
|              | 07:00 | 0.98 (0.93-1.03) | 1.000  | 0.93 (0.88-0.98) | 0.998  | 1.06 (0.95-1.18) | 0.993  |
|              | 08:00 | 1.45 (1.39-1.52) | <0.001 | 1.33 (1.27-1.4)  | <0.001 | 1.17 (1.05-1.29) | 0.993  |
|              | 09:00 | 1 (0.96-1.05)    | 1.000  | 0.95 (0.9-1)     | 0.998  | 1.05 (0.95-1.17) | 0.993  |
|              | 10:00 | 1.04 (0.99-1.09) | 1.000  | 0.94 (0.89-0.99) | 0.998  | 1.13 (1.02-1.26) | 0.993  |
|              | 11:00 | 0.81 (0.77-0.85) | <0.001 | 0.77 (0.73-0.82) | <0.001 | 1.03 (0.92-1.14) | 0.993  |
|              | 12:00 | 1 (0.95-1.05)    | 1.000  | 0.94 (0.89-0.99) | 0.998  | 1.02 (0.92-1.13) | 0.993  |
|              | 13:00 | 0.74 (0.7-0.78)  | <0.001 | 0.74 (0.7-0.79)  | <0.001 | 0.9 (0.8-1)      | 0.993  |
|              | 14:00 | 0.78 (0.74-0.82) | <0.001 | 0.74 (0.7-0.79)  | <0.001 | 0.98 (0.88-1.09) | 0.993  |
|              | 15:00 | 0.8 (0.76-0.84)  | <0.001 | 0.79 (0.75-0.84) | <0.001 | 0.85 (0.76-0.96) | 0.993  |
|              | 16:00 | 0.73 (0.69-0.77) | <0.001 | 0.74 (0.7-0.79)  | <0.001 | 0.85 (0.76-0.95) | 0.993  |
|              | 17:00 | 0.73 (0.69-0.77) | <0.001 | 0.73 (0.68-0.77) | <0.001 | 0.96 (0.86-1.08) | 0.993  |
|              | 18:00 | 0.77 (0.73-0.81) | <0.001 | 0.78 (0.74-0.83) | <0.001 | 0.89 (0.79-1)    | 0.993  |

|            |       |                  |        |                  |        |                  |        |
|------------|-------|------------------|--------|------------------|--------|------------------|--------|
|            | 19:00 | 0.77 (0.73-0.81) | <0.001 | 0.79 (0.74-0.83) | <0.001 | 0.91 (0.81-1.02) | 0.993  |
|            | 20:00 | 0.92 (0.87-0.96) | 0.253  | 0.92 (0.87-0.98) | 0.998  | 0.93 (0.83-1.05) | 0.993  |
|            | 21:00 | 0.84 (0.8-0.88)  | <0.001 | 0.85 (0.8-0.9)   | <0.001 | 0.91 (0.81-1.02) | 0.993  |
|            | 22:00 | 0.91 (0.87-0.96) | 0.095  | 0.92 (0.87-0.97) | 0.743  | 0.94 (0.84-1.05) | 0.993  |
|            | 23:00 | 0.94 (0.89-0.98) | 1.000  | 0.95 (0.9-1.01)  | 0.998  | 0.97 (0.87-1.09) | 0.993  |
| No Statins |       |                  | 1      |                  | 1      |                  | 1      |
|            | 01:00 | 0.9 (0.87-0.93)  | <0.001 | 0.89 (0.85-0.93) | <0.001 | 0.99 (0.94-1.05) | 0.993  |
|            | 02:00 | 0.94 (0.91-0.97) | 0.073  | 0.91 (0.88-0.95) | 0.005  | 1.04 (0.98-1.1)  | 0.993  |
|            | 03:00 | 0.94 (0.91-0.97) | 0.165  | 0.91 (0.88-0.95) | 0.007  | 1.03 (0.98-1.09) | 0.993  |
|            | 04:00 | 0.89 (0.86-0.92) | <0.001 | 0.88 (0.84-0.91) | <0.001 | 1.01 (0.95-1.07) | 0.993  |
|            | 05:00 | 0.87 (0.84-0.9)  | <0.001 | 0.84 (0.8-0.87)  | <0.001 | 1.02 (0.96-1.08) | 0.993  |
|            | 06:00 | 0.99 (0.96-1.02) | 1.000  | 0.94 (0.9-0.97)  | 0.458  | 1.07 (1.01-1.13) | 0.993  |
|            | 07:00 | 1.14 (1.11-1.18) | <0.001 | 1.06 (1.02-1.1)  | 0.998  | 1.12 (1.06-1.18) | 0.025  |
|            | 08:00 | 1.64 (1.6-1.69)  | <0.001 | 1.47 (1.42-1.52) | <0.001 | 1.31 (1.24-1.37) | <0.001 |
|            | 09:00 | 1.24 (1.21-1.28) | <0.001 | 1.09 (1.05-1.13) | 0.005  | 1.22 (1.16-1.28) | <0.001 |
|            | 10:00 | 1.33 (1.29-1.37) | <0.001 | 1.15 (1.11-1.19) | <0.001 | 1.25 (1.19-1.31) | <0.001 |
|            | 11:00 | 1.08 (1.05-1.12) | 0.001  | 0.96 (0.92-1)    | 0.998  | 1.18 (1.12-1.24) | <0.001 |
|            | 12:00 | 1.33 (1.29-1.37) | <0.001 | 1.21 (1.16-1.25) | <0.001 | 1.22 (1.16-1.28) | <0.001 |
|            | 13:00 | 0.99 (0.96-1.02) | 1.000  | 0.9 (0.86-0.94)  | 0.001  | 1.1 (1.05-1.17)  | 0.188  |
|            | 14:00 | 1.04 (1.01-1.08) | 1.000  | 0.97 (0.93-1.01) | 0.998  | 1.1 (1.05-1.16)  | 0.205  |
|            | 15:00 | 1.09 (1.05-1.12) | <0.001 | 1.01 (0.97-1.05) | 0.998  | 1.14 (1.08-1.2)  | 0.001  |
|            | 16:00 | 0.98 (0.95-1.01) | 1.000  | 0.93 (0.89-0.97) | 0.267  | 1.1 (1.04-1.16)  | 0.761  |
|            | 17:00 | 0.9 (0.87-0.93)  | <0.001 | 0.88 (0.84-0.92) | <0.001 | 1.01 (0.96-1.07) | 0.993  |
|            | 18:00 | 0.94 (0.91-0.97) | 0.174  | 0.91 (0.88-0.95) | 0.009  | 1.05 (1-1.11)    | 0.993  |
|            | 19:00 | 0.9 (0.87-0.93)  | <0.001 | 0.87 (0.84-0.91) | <0.001 | 1.02 (0.97-1.08) | 0.993  |
|            | 20:00 | 1 (0.97-1.04)    | 1.000  | 0.98 (0.94-1.02) | 0.998  | 1.03 (0.98-1.09) | 0.993  |
|            | 21:00 | 0.91 (0.88-0.94) | <0.001 | 0.89 (0.85-0.93) | <0.001 | 1.01 (0.95-1.07) | 0.993  |
|            | 22:00 | 0.96 (0.93-0.99) | 1.000  | 0.94 (0.9-0.97)  | 0.384  | 1.03 (0.97-1.08) | 0.993  |
|            | 23:00 | 0.93 (0.9-0.96)  | 0.019  | 0.9 (0.86-0.94)  | <0.001 | 1.02 (0.97-1.08) | 0.993  |

### Supplementary table 2. Subgroup analyses.

All p-values are adjusted for multiple testing.

ACE-I= Angiotensin Converting Enzyme-Inhibitors; ARB= angiotensin receptor blocker; CAD=Coronary artery disease.

### Subgroup Analyses of National Holidays

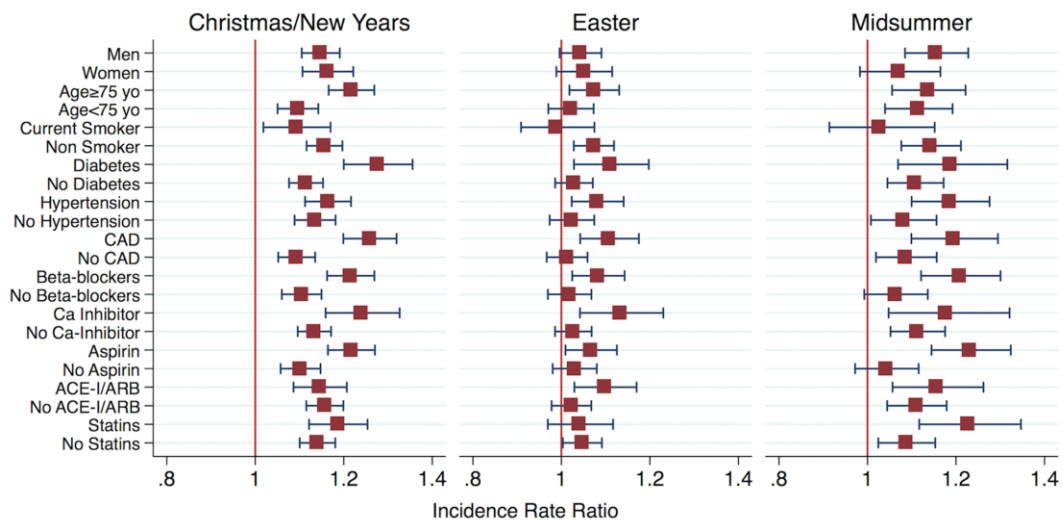

### Supplementary Figure 1. Subgroup analyses.

Shown are the associated risks of overall MI in various subgroups and major national holidays expressed as incidence rate ratios. Christmas/New years include Christmas Eve, Christmas Day, Boxing Day, New Years Eve and Day as well as the epiphany. Easter holiday includes Good Friday, Easter Eve and Day and Easter Monday. P-value<0.05 for all bars not crossing the red line. P-values after adjustment for multiple testing are presented in Supplementary Table 1.

## Sensitivity Analyses

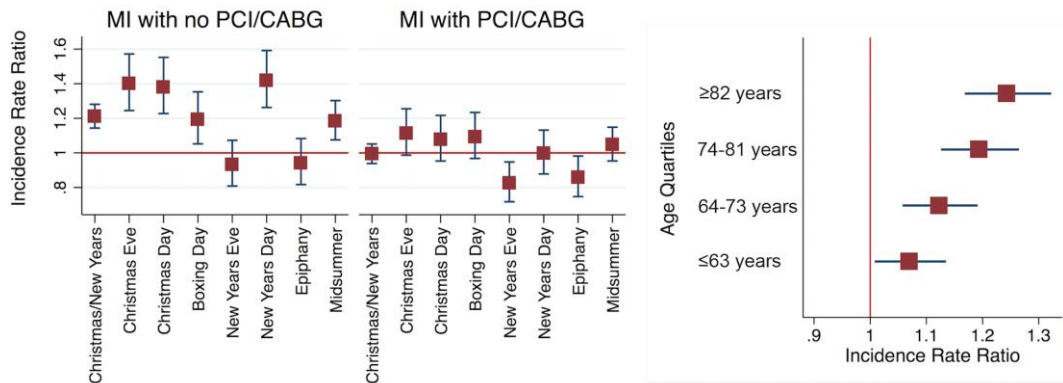

### Supplementary Figure 2. Additional subgroup analyses.

Left figure shows the associated risk of MI requiring revascularization after coronary angiography was performed vs. those who did not undergo PCI/CABG on holidays. Right figure shows the associated risk of MI on Christmas/New Years' holiday for each age quartile. Christmas/New Years' include Christmas Eve, Christmas Day, Boxing Day, New Years' Eve and Day as well as the epiphany. P-value<0.05 for all bars not crossing the red line.

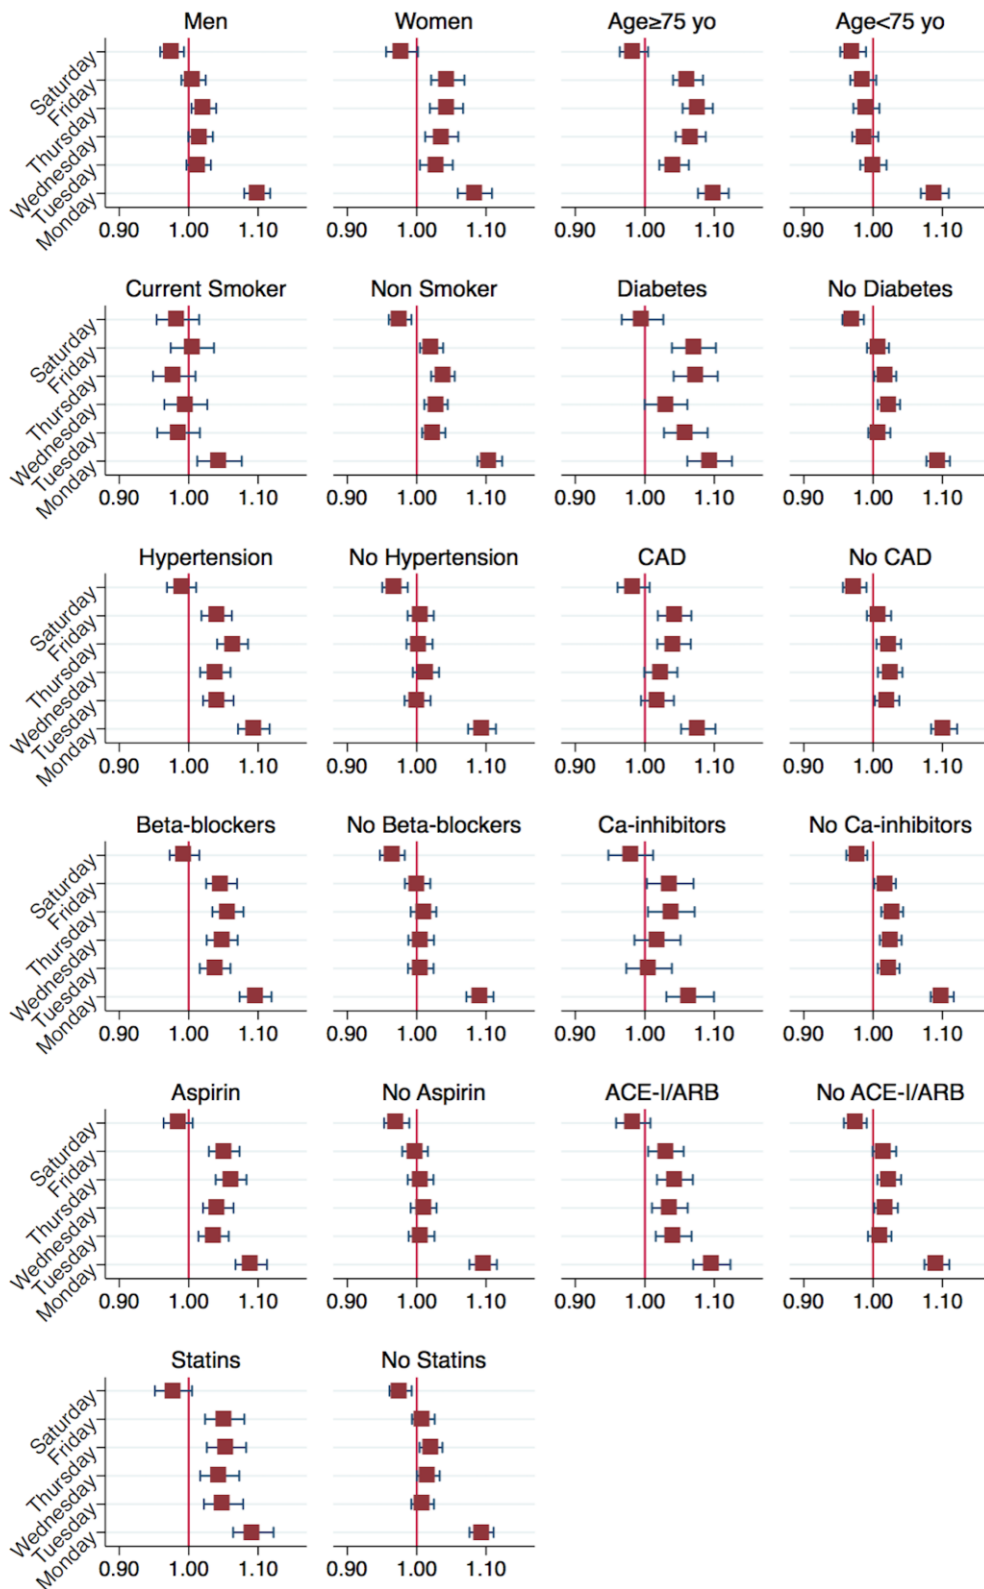

**Supplementary Figure 3. Subgroup analyses of day of week.**

Shown are the associated risks of overall MI in various subgroups and day of week expressed as incidence rate ratio. Reference period for day of week is Sunday and reference hour for hour of symptom onset is 00:00. P-values after adjustment for multiple testing are presented in Supplementary Table 1.

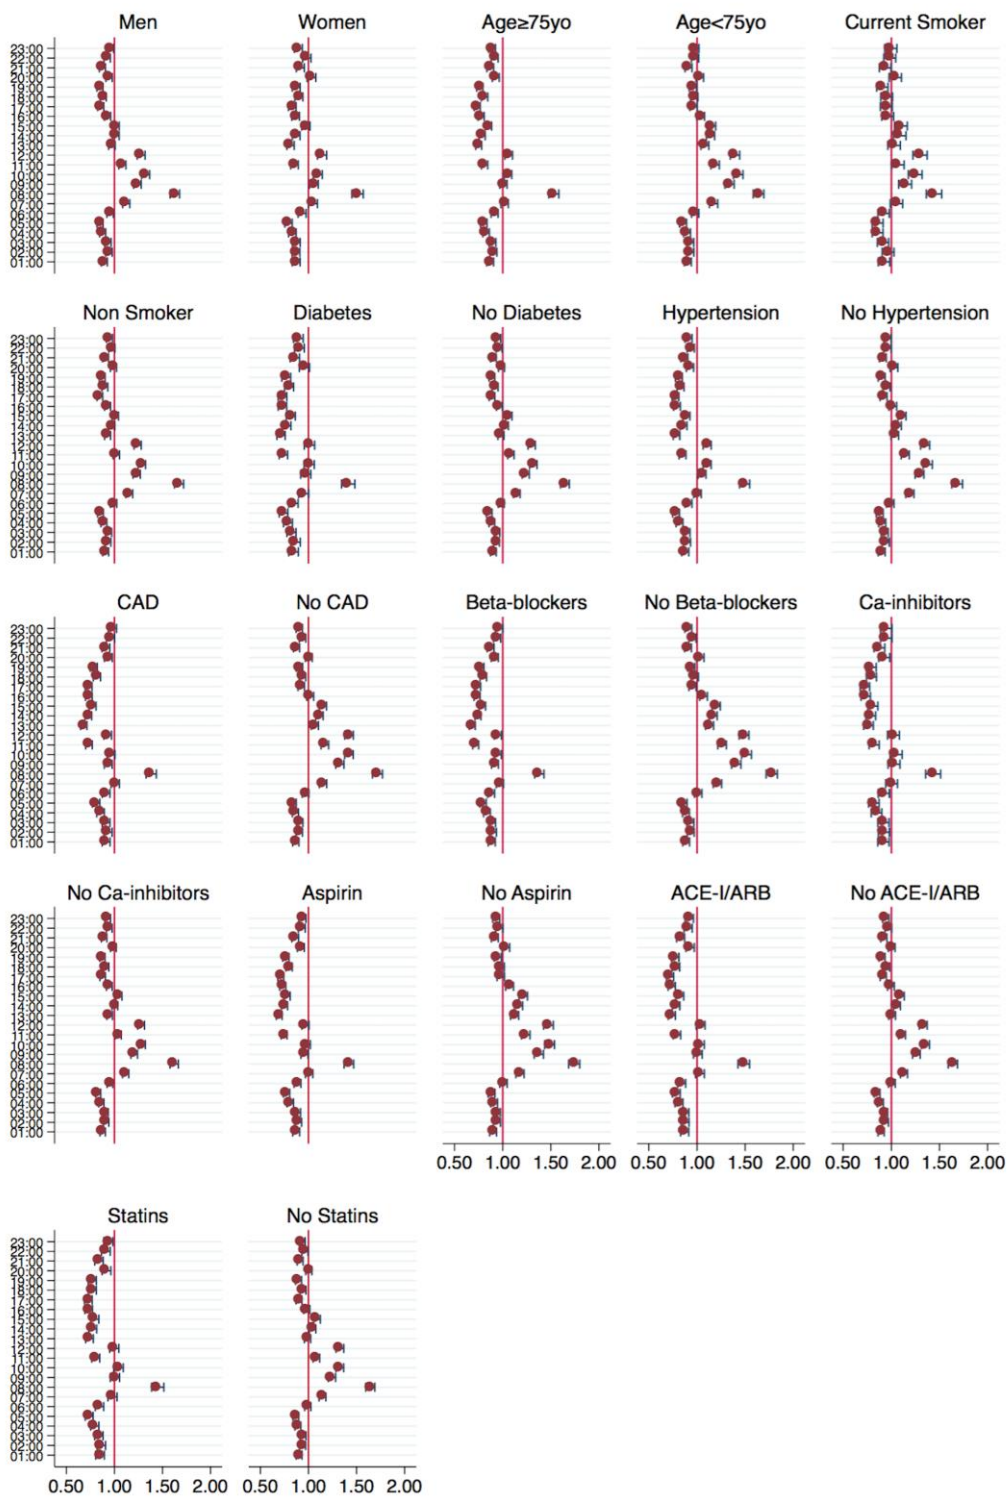

**Supplementary Figure 4. Subgroup analyses of hour of symptom onset**



Shown are the associated risks of overall MI in various subgroups and hour of symptom onset expressed as incidence rate ratios. Reference period is 00:00. P-values after adjustment for multiple testing are presented in Supplementary Table 1.
